# Supplementary material for: Evaluation of soybean germplasm conserved in NIAS genebank and development of mini core collections
Source: PubMed Central journal article supplement — Breed Sci. 2012 Feb 4;61(5):566–92. doi: 10.1270/jsbbs.61.566 (PMC3406788; doi:10.1270/jsbbs.61.566), 2012-02-04
Supplement: 61_566_3.pdf [file 61_566_3.pdf]

### Supplemental Fig. 3.

A detailed neighbor-joining phylogenetic tree of 1,603 accessions, Japanese (n=998) and exotic cultivated soybeans (n=341), Japanese (n=74) and exotic wild soybeans (n=190), based on the allele sharing distance. The accession name consisted of their origin, accession number, accession name, seed coat color and ecological types and those partitioned by the mark "■". Numbers with JP and PI indicate that NIAS Genebank and USDA germplasm plant introduction number, respectively. Seed coat color were classified as BK, Black; BKBRMottle, Black with brown mottle; BR, Brown; BRBKMottle, Brown with black mottle; BRBKSaddle, Brown with black saddle; DBR, Dark brown; DG, Dark green; GR, Green; GRBKSaddle, Green with black saddle; GRBRSaddle, Green with brown saddle; GY, Greenish yellow; GYBKSaddle, Greenish yellow with black saddle; GYBRSaddle, Greenish yellow with brown saddle; GYDBRSaddle, Greenish yellow with dark brown saddle; GYGRSaddle, Greenish yellow with black mottle; RB, Reddish brown; YBR, Light brown; YG, Yellowish green; Y, Yellow; YW, Yellowish white; YWBKMottle, Yellowish white with black mottle; YWBKSaddle, Yellowish white with black saddle; YWBRsaddle, Yellowish white with dark brown saddle; YWDBRSaddle, Yellowish white with dark brown saddle. The letters and numeric characters in square bracket of the legend for each cluster are phenotype information followed by the representative ecological types; DF, Days to flowering; FH, Period from first flowering to start harvest; PH, plant height; SW, 100 seed weight; seed coat color.

# Japanese soybean cluster

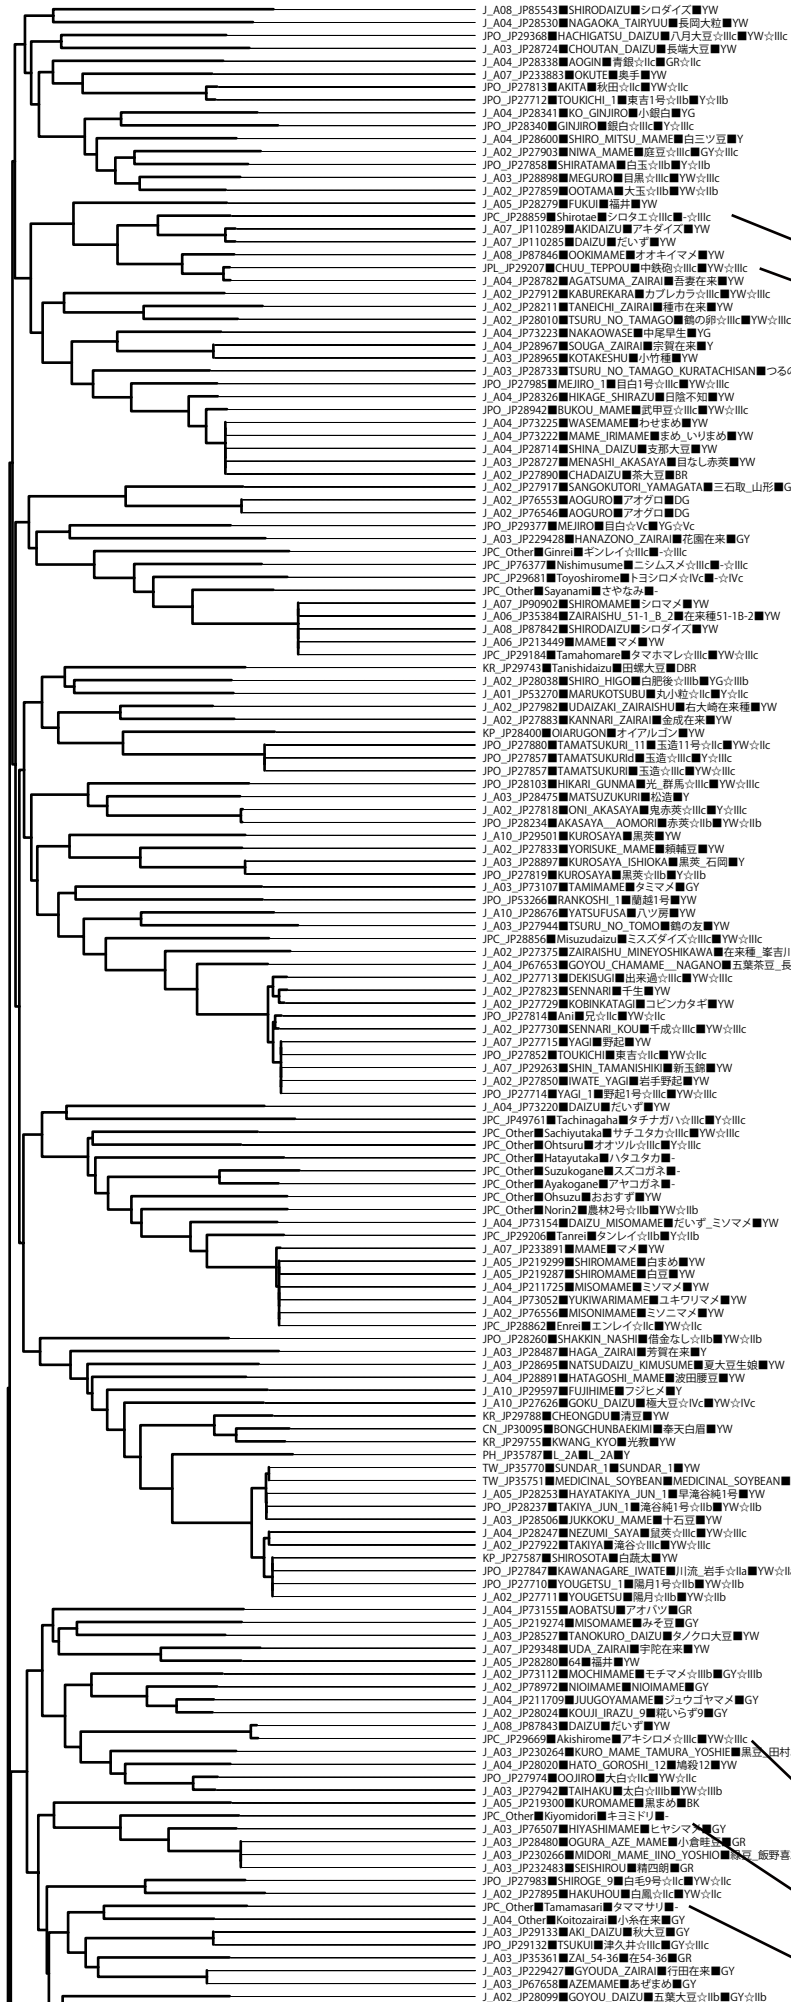

**J1a: A2-A4, A7-A8 regions** [IIb-IIIc, DF52(5), FH74(7), PH72(16), SW32(6), Yellow white seed]

Shirotae  
Chuteppou

**J1b: A2-A3 regions** [IIIc-Vc, DF51(10), FH79(6), PH63(20) SW33(6), Yellow white seed]  
Tamahomare, Ginrei, Sayanami, Toyoshirome, Nihsimusume

**J1c: A2-A4 regions** [IIb-IIIc, DF47(4), FH68(7), PH64(16), SW31(5), Yellow white seed]

Misuzudaizu

**J1d: A2-A5, A10 regions** [IIb-IIIc, DF46(4), FH62(8), PH55(17), SW29(7), Yellow white seed]  
Enrei, Tachinagaha, Sachiutaka, Hatayutaka, Ohsuzu, Ootsuru, Ayakogane, Suzukogane, Tanrei, Norin2

**J2: A2-A5 regions** [IIa-IIIc, DF49(6), FH73(7), PH61(16), SW39(8), Green seed]

Akishirome

Kiyomidori

JPO JP29132 TSUKIYUKI DAIZU 赤大粒 Y☆  
JPO JP29133 AKI DAIZU 赤大粒 Y☆  
J\_A03 JP29132 TSUKIYUKI DAIZU 赤大粒 Y☆  
J\_A03 JP29133 AKI DAIZU 赤大粒 Y☆  
J\_A03 JP29134 WASEMAME 赤大粒 Y☆  
J\_A02 JP28099 GOYOU DAIZU 五葉大豆 Y☆  
J\_A02 JP27846 KURO MAME 黒豆 BK  
J\_A04 JP21171 HIRAGOMIYUME エチゴメ GR  
J\_A04 JP27305 HIRAKAKI SAZAI 英香 GR  
J\_A04 JP27309 SAKANAMAME サカナマメ Y☆  
J\_A04 JP28335 KOUJI IRAZU 惣いらす Y☆  
J\_A02 JP28032 AKITA ZAIRAI 1 秋田在来1号 Y☆  
J\_A02 JP27655 MISONO MAME シノメ Y☆  
J\_A02 JP27314 WASEMAME センメ Y☆  
J\_A02 JP28553 SHIROMAME シロメ Y☆  
J\_A05 JP27945 AOROKU 青六 Y☆  
J\_A02 JP28258 WASE OIRAN 厚生オランダ Y☆  
J\_A03 JP27946 WAKATSUKI 赤豆 BK  
J\_A06 JP28353 KUKASU ZAIRAI 1 宮在来 Y☆  
J\_A05 JP28271 KUGATSU MAME 九月豆 Y☆  
J\_A03 JP28864 MIKAWASHIMA EDAMAME 三河島 枝豆 YW  
TW JP35758 ISLAND\_OF\_3\_RIVER ISLAND\_OF\_3\_RIVER YW  
J\_A03 JP28858 NISHIHARA 西新井 YW  
J\_A03 JP28881 TAKAYAGI 高柳 YW  
J\_A03 JP28584 MIKAWASHIMA 三河島 YW  
J\_A04 JP28246 MIZUKUGURI 水滸 Y☆  
J\_A02 JP27724 OOMEEDAMA 大目玉 YW  
CN JP3000 PEKIN DAL OUTOU 北京大豆 YW  
J\_A02 JP27851 SHIRO TENDAI 白粒 Y☆  
JPO JP29129 HANAYOME IBARAKI 1 花嫁在来1号 Y☆  
J\_A03 JP29141 NINOMIYA ニノ宮 YW  
JPO JP28732 BIKUNI 比久 Y☆  
CN JP2760 SJI LI HUANG 四粒黄 YW  
J\_A03 JP2760 SJI LI HUANG 四粒黄 YW  
CN JP30105 BONGCHUNBAEKJAM 落天白豆 Y☆  
KR JP29780 CHUHOHOKU HAKU 忠北白 YW  
J\_A04 JP28587 BON MAME 豆 Y☆  
JPO JP27388 JAPONSOJU 本庄 YW  
J\_A03 JP28481 HANAYOME 花嫁 Y☆  
CN JP2760 NIU ZHUANG 牛莊 YW  
J\_A05 JP28534 SHAKKIN NASHI SEN 借金ナシ選 YW  
J\_A03 JP28474 SHAKKIN NASHI 借金なし Y☆  
JPO JP28484 TOCHIGI 2 藤木 Y☆  
J\_A02 JP28481 HANAYOME 花嫁 Y☆  
J\_A02 JP28011 SHAKKIN NASHI 借金ナシ Y☆  
J\_A02 JP27975 ZAIRAISHU IGU 在来種 伊良 Y☆  
J\_A02 JP28101 AZUKI MAME 小豆 Y☆  
J\_A02 JP28162 AODAIZU アオダイズ GR  
J\_A02 JP28001 AO SHIHO 小粒 Y☆  
JPO JP53301 KUROSAYA 黒莢 Y☆  
JPO JP53294 GINDAIZU 緑大豆 Y☆  
J\_A02 JP28460 SANDAN MAME 散弾豆 BK  
JPO JP27431 WASE KURO SENGOKU 厚生黒千石 BK  
J\_A02 JP27980 KUROZATO MAME 黒豆 BK  
J\_A02 JP28130 KINAKO MAME 苗豆 Y☆  
J\_A02 JP28094 SAKYUO AO MAME 砂丘青豆 Y☆  
J\_A02 JP28554 SASHIMIMAME サシメ GR  
J\_A02 JP28554 KUROME 黒豆 YW  
J\_A02 JP27723 MISO MAME 味噌豆 Y☆  
JPO JP27660 Aojiro 青白 Y☆  
J\_A01 JP53290 DATESHINDAIZU 4 伊達新大豆 Y☆  
JPO JP27374 Sangokudaizu 三石大豆 Y☆  
JPO JP27456 CHUUSEI HADAKA 中生裸 Y☆  
J\_A01 JP53280 OUYACHI MAKURETSU 大谷 黒 Y☆  
JPO JP53303 AKASAYA 1 赤莢1号 Y☆  
JPO JP53267 SHIZUNDAIZU 静岡大豆 Y☆  
JPO JP27414 ISHKARI SHIRO 1 石狩白1号 Y☆  
J\_A01 JP53302 HIDAkakuroSAYA 白高莢 Y☆  
JPO JP28452 OYACHI DAIZU 大谷 白 Y☆  
J\_A02 JP28553 AOMAME アオメ GR  
J\_A01 JP53317 BIBUNDAIZU 美分大豆 Y☆  
JPO JP27704 MARU SHOURYUU 丸小豆 Y☆  
J\_A01 JP53299 IDAZU KARIYUTAKA たいず 狩太 YW  
JPO JP53268 KUKANAKA 黒粒大豆 Y☆  
J\_A01 JP49457 ASHORO 足寄 YW  
J\_A03 JP28874 YAMAUCHI DAIZU 山内大豆 YW  
J\_A01 JP53319 YAMAUCHIDAIZU 山内大豆 Y☆  
JPO JP27498 Kitaminagaha 北長葉 Y☆  
J\_A01 JP53320 Kitaminagaha 北長葉 Y☆  
J\_A01 JP53336 KUSSHARO SUZUKU 裾斜路 Y☆  
JPO JP27439 Tokachinagaha 十勝長葉 Y☆  
JPC Other Kariyutaka カリユタカ Y☆  
JPC Other Yukiomare ユキオマレ Y☆  
JPC Other K7676 Kitakuro 北黒 Y☆  
JPC JP27541 Toyomusume トヨムスメ Y☆  
JPC JP27539 Tokachikuro トカチクロ Y☆  
JPC JP200328 Hayahikari ハヤヒカリ Y☆  
J\_A01 JP27498 Kitaminagaha 北長葉 Y☆  
J\_A01 JP200382 ABASHIRI 8 網走8号 Y☆  
JPO JP28694 WASE HADAKA 厚生裸 YW  
JPO JP53265 WASEHADAKA 厚生裸 Y☆  
SW JP30465 Fiskeby Fiskeby Y☆  
JPC Other Toyohomare トヨホマレ Y☆  
JPC JP53275 Toyokomachi トヨコマチ Y☆  
CN JP86616 JIAOHE TIAN DAN 蛟河天團 YW  
J\_A01 JP49456 FUKUSHIMA UMEHARA 福島 地蔵 YW  
JPO JP53264 Ouyachi 大谷 Y☆  
JPO JP27438 Okuhara 1 奥原1号 Y☆  
J\_A01 JP49456 GOKUWASE-KAMISHUNBETSU 極早上春別 YW  
J\_A02 JP28162 EZONISHIKI エソニシキ YWBRSaddle  
J\_A01 JP27700 OUYACHI 大谷 Y☆  
J\_A01 JP200418 SASASHIRI 12 網走46号 YW  
J\_A01 JP200386 ABASHIRI 12 網走12号 YW  
J\_A01 JP53392 KONSEN 21 網走21号 Y☆  
J\_A01 JP53344 URAYAMAWASE 浦山厚生 YW  
J\_A01 JP53333 GOKUWASE NAKASHIBETSU 極早中生裸 YW  
J\_A01 JP53263 MIMIHARUDAIZU 三春大豆 Y☆  
J\_A01 JP53292 YAKUMO MEAKA 八雲白莢 YW  
J\_A01 JP27416 TSURUNOKO 鶴の子 Y☆  
J\_A03 JP28525 SHIRO TAIRYUU 白粒 YW  
JPO JP27441 KANRO 甘藷 Y☆  
JPO JP27415 SHIRO TSURUNOKO 白鶴の子 Y☆  
JPL JP27533 Yuzuru ユヅル Y☆  
J\_A02 JP27723 MOCHI MAME 糯豆 YW  
J\_A02 JP28143 TAIRADATE ZAIRAISHU 平館在来種 YW  
J\_A10 JP29499 NANTSU KURAKAKE 夏秋 Y☆  
JPO JP27698 SHIMO SHIRAZU 1 網走1号 YW  
JPO JP27426 YOSHIOKA DAIRYUU 吉岡大粒 Y☆  
J\_A10 JP29619 WASE KURO DAIZU 厚生黒大豆 BK  
J\_A01 JP53338 SHIBecha NAGAO 3 糯茶長尾3号 Y☆  
J\_A01 JP27450 Sakamoto\_wase 本庄厚生 Y☆  
J\_A02 JP28365 GOKUWASE HADAKA 厚生裸 Y☆  
J\_A02 JP28127 YUKIWARA MAME 網走 Y☆  
J\_A02 JP27462 YUKINOSHITA 鶴の下の Y☆  
J\_A01 JP27454 KOSODEFURI 小袖振 Y☆  
J\_A02 JP28553 AOMAME アオメ GR  
J\_A02 JP27544 AOMAME アオメ GR  
J\_A01 JP49455 KONSEN 27 網走27号 Y☆  
J\_A01 JP49455 MOTOFUKE-OSUDE 音更大粒 Y☆  
J\_A02 JP28553 KURUMAME クロメ BK  
J\_A01 JP200450 ABASHIRI 8 網走8号 BK  
JPO JP49454 CHUUSEI KURO DAIRYUU 厚生黒大粒 BK  
J\_A01 JP200361 KINAKOMAME MUKAWA 幸十豆 瑞川 GR  
J\_A01 JP200420 ABASHIRI 48 網走48号 BK  
J\_A02 JP54196 COL AOMORI 1981 L146-2 COL青森1981 Y☆  
J\_A01 JP200447 ABASHIRI 7 網走7号 Y☆  
J\_A01 JP200404 ABASHIRI 3 網走3号 Y☆  
J\_A01 JP53401 ABASHIRI 27 網走27号 Y☆  
J\_A01 JP53398 KONSEN 35 網走35号 Y☆  
J\_A01 JP53347 WASEOUSODE SHIKAOI ITOH 厚生大粒 鹿通 伊東 Y☆  
J\_A09 JP29469 KINAI TOKUSHIMA 2 畿内長葉2号 YW  
J\_A01 JP52770 FURANOMARU フラン丸 YW  
J\_A03 JP28880 KITAJIRO 北台 Y☆  
JPO JP27437 NAGAHA HADAKA 1 長葉1号 Y☆  
JPC JP28151 Fukushima フクシマ Y☆  
J\_A02 JP28528 TOFU MAME トウフメ YW  
JPC JP28336 Suzukari すすかり Y☆  
J\_A02 JP28554 SHIROMAME シロメ YW  
J\_A02 JP28553 MEJIROMAME メジロメ YW  
JPL JP27817 Gedenshirazu 1 下田不知1号 Y☆  
J\_A04 JP27372 NATTOUMAME ネットウメ YW  
J\_A02 JP27817 GEDEN SHIRAZU 下田不知 Y☆  
J\_A02 JP28303 KANAWAGA 菅カワナガ Y☆  
IN JP30245 L 46 YW  
JPC Other Ryuhou リウホウ Y☆  
J\_A02 JP28163 MAME 豆 YW  
JPC JP28355 Suzuyutaka すすゆたか Y☆  
JPC JP28355 Wasesuzunari フサメ Y☆  
JPC JP28030 Okushirome オクシロメ Y☆  
J\_A02 JP21174 SHIROMAME シロメ YW  
J\_A02 JP28553 SHIROMAME シロメ YW  
JPC JP28378 Tachiutaka たちうたか Y☆  
J\_A03 JP28870 ARAKUI SHIRAZU フラシラ Y☆  
J\_A04 JP28245 KATAZAYA かつざや Y☆  
J\_A03 JP28736 YORIMACHI ZAIRAI 1 寄居在来1号 Y☆  
J\_A06 JP27549 FUJI 4 富士4号 Y☆  
J\_A10 JP28375 HADAKA MAE 油大豆 Y☆

# Kiyomidori Tamamasari

**J3a: A2-A5 regions**  
[IIa-IIIc, DF42(3), FH54(4), PH51(15), SW28(4), Yellow white seed]

**J3b: A2 region** [IIb-IIIb, DF46(5), FH67(3), PH50(12), SW21(9), Colored seed]

**J3c: A1-A2 regions**  
[Ia-IIIc, DF40(5), FH61(9), PH48(12), SW26(3), Yellow white seed]

# Narrow leaflets Tokachinagaha

**J3d: A1 regions**  
[Ia-Ib, DF33(3), FH54(5), PH41(9), SW31(3), Yellow white seed]

Yukiomare, Tokachikuro, Toyomusume, Hayahikari, Kitamusume, Toyohomare, Toyokomachi, Wasehadaka, Kariyutaka

**J3e: A1-A2 regions**  
[Ib-IIc, DF36(4), FH62(9), PH39(13), SW33(10), Colored seed]

**J3f: A2, A3, A6**  
[IIa-IIc, DF42(4), FH60(10), PH51(14), SW24(6), Yellow white seed]

Ryuhou, Suzuyutaka, Suzukari, Wasesuzunari, Okushirome, Fukushima, Tachiutaka, Gedenshirazu

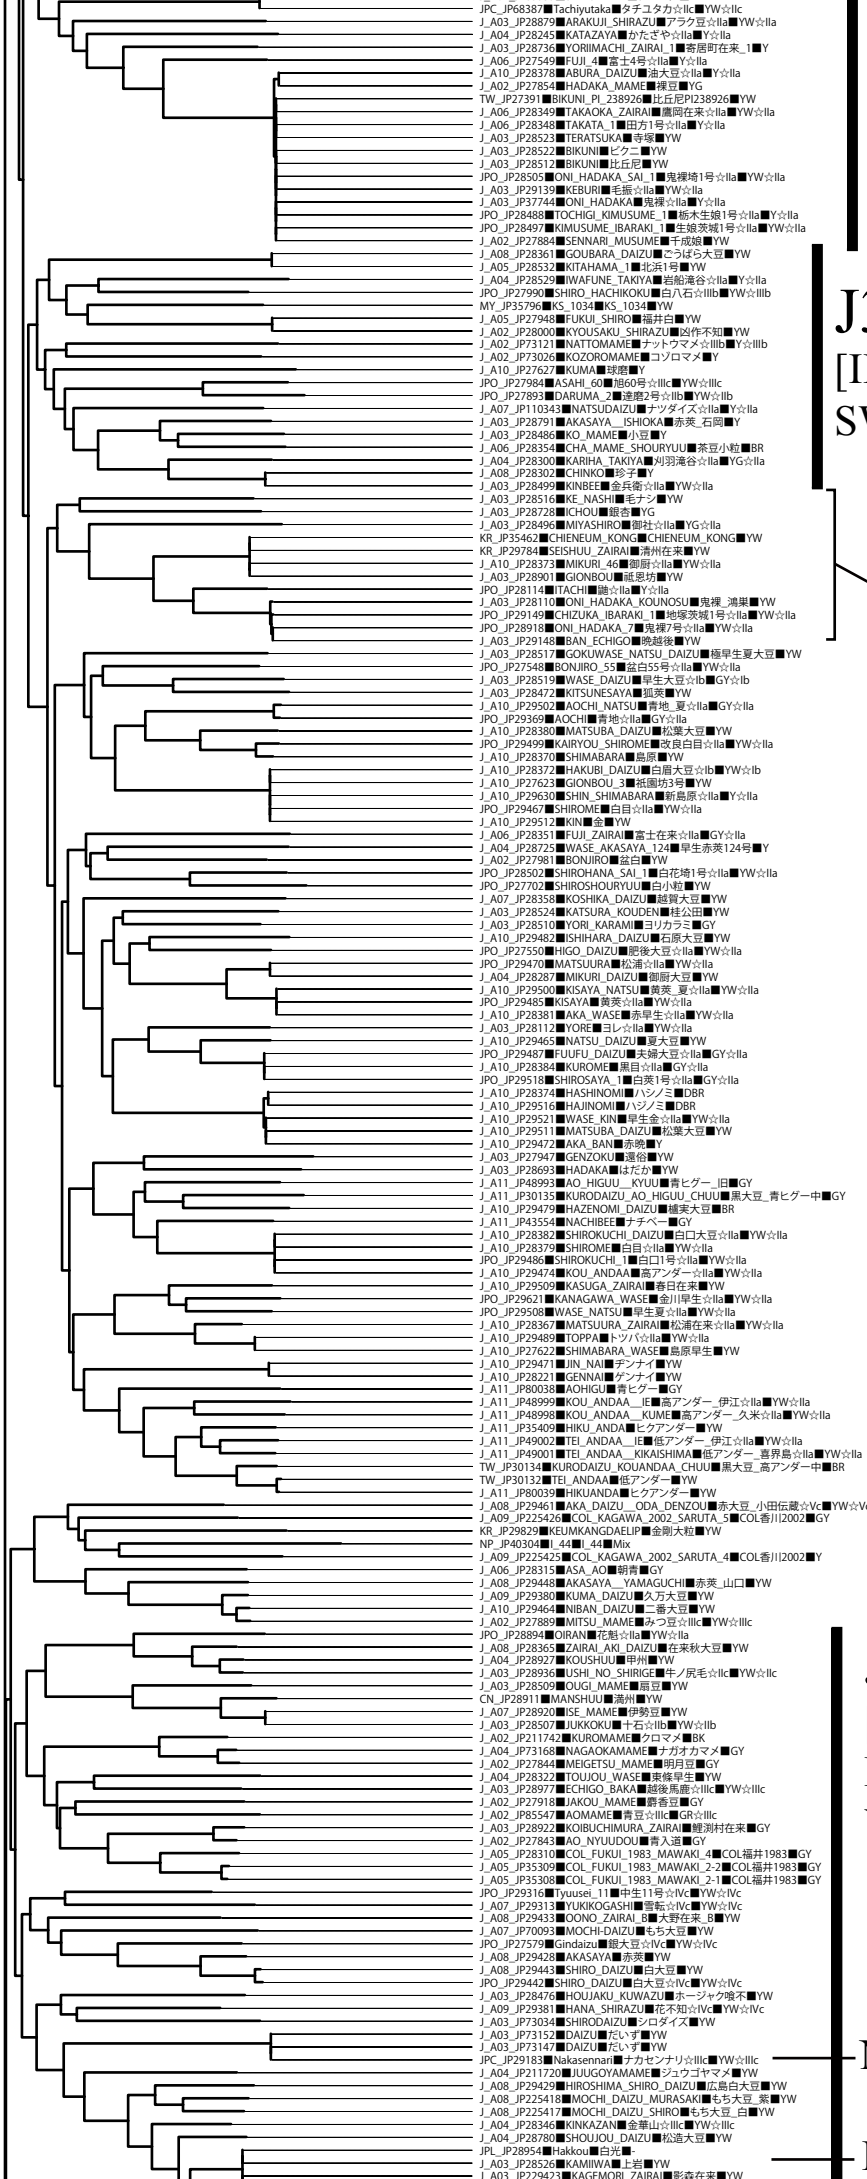

Waxesuzunari, Okushirirome, Fukushima, Tachiutaka, Gedenshirazu

J3g: A2-A5 regions  
[IIa-IIIc, DF47(6), FH57(8), PH56(13), SW20(5), Yellow white seed]

Glabrous pubescent soybean

J3h: A3, A10-A11 regions  
[Ib-IIa, DF44(4), FH47(4), PH50 (11), SW18(3), Yellow white seed]

J4: A2-A9 regions  
[IIa-Vc, DF53(8), FH72(8), PH73(22), SW34(6), Yellow white seed]

Nakasennari

Hakkou

J\_A08 JP225417 MOCHI\_DAIZU\_MURASAKI utschidai 赤 YW  
 J\_A08 JP225417 MOCHI\_DAIZU\_SHIRO\_MURASAKI utschidai 白 YW  
 J\_A04 JP28346 KINKAZAN 登舞山 赤 illic YW 赤 illic  
 J\_A04 JP28789 SHIRODAI 白粒大豆 YW  
 JPL JP28954 Hakkou 白壳 YW  
 J\_A03 JP28526 KAMIWA 上岩 YW  
 J\_A03 JP229423 KAGEMORI\_ZAIRAI 形盛在来 YW  
 J\_A03 JP73159 KOMAME コマメ YW  
 J\_A03 JP73696 KOMAME コマメ YW  
 J\_A04 JP28770 HOUJAKU ほうじやく YW  
 J\_A03 JP76506 MISODAIZU ミソダイズ YW  
 J\_A03 JP67659 BATOUZAIRAI 馬頭在来 YW  
 J\_A03 JP76505 CIRANMAME 翠インマメ YW  
 J\_A03 JP28476 AISA アイサ 赤 illic YW 赤 illic  
 J\_A03 JP28477 AKAGI\_SHITA 赤城下 YW  
 J\_A04 JP28769 MIBU\_ZAIRAI 禾生在来 YW  
 J\_A03 JP35368 ZAI 54-47 在54-47 YW  
 J\_A02 JP76562 TACHINGOCHIKAKAI インチキカラ YW  
 J\_A04 JP23055 KUROMAME クロマメ BK  
 J\_A06 JP28316 SHIRAKAWA\_CHA\_MAME 白川茶豆 RB  
 KR JP29824 LEE\_KAM\_KWAN 季監官 GR  
 KR JP29789 CHEONGYE\_MYONGTAE CHEONGYE\_MYONGTAE GR  
 KR JP29761 LEKAKMKN 季監官 GR  
 J\_A11 JP49033 SHIROKANA TAIRYU\_HADAKA 白花粒種 YW  
 J\_A05 JP28309 COL\_FUKUJ\_1983\_MAWAKI\_3 COL福井1983 YW  
 J\_A04 JP208723 SHIROMAME シロマメ YW  
 J\_A02 JP27911 SUNAZUMI 砂積 YW  
 J\_A10 JP85524 AKIDAIZU フキダイズ YW  
 JPC JP29593 Akisengoku 赤生豆 YW 赤 illic  
 J\_A08 JP8554 DAIZU だいず YW  
 J\_A04 JP28269 YONAYOU ヨーヨー 赤 illic YW 赤 illic  
 J\_A08 JP29462 KJ\_DAIZU\_HAYASHI\_YAKO 黄大豆 林の赤子 YW  
 J\_A08 JP29445 ASAJIRO 明正 YW  
 J\_A08 JP28362 SAGI\_SHIRO 新種 白大豆 YW  
 JPO JP29346 Akasaya 赤英 赤 illic YW 赤 illic  
 J\_A07 JP29265 AKASAYA 赤英 赤 illic YW 赤 illic  
 J\_A07 JP29264 AKASAYA 赤英 赤 illic YW 赤 illic  
 J\_A04 JP73218 DAIZU だいず YW  
 J\_A05 JP28254 AKASAYA 赤英 赤 illic YW 赤 illic  
 J\_A08 JP29450 ASASHI 昭日 YW  
 JPO JP28789 Akasaya 赤英 赤 illic YW 赤 illic  
 J\_A03 JP46064 AOGOZEN\_MITOSHI\_KAMIKUNICHOU\_1 青御前 水戸市上国并町1 赤 illic GR 赤 illic  
 J\_A03 JP28929 GIO 祇園 赤 illic YW  
 J\_A03 JP29424 COL\_EHIME\_1983\_UTSUNOMIYA\_19 COL愛媛1983 GR  
 J\_A07 JP09015 DAIZU\_AO だいず オオ GR  
 J\_A09 JP29425 COL\_EHIME\_1983\_UTSUNOMIYA\_23 COL愛媛1983 DG  
 J\_A03 JP35338 ZAI 52-12 在52-12 DG  
 J\_A09 JP81624 DAIZU だいず RB  
 J\_A09 JP81621 DAIZU だいず RB  
 J\_A07 JP67665 HIDAKA\_AODAIZU 白高青大豆 GR  
 J\_A04 JP76521 AOBATO 青莢豆 DG  
 J\_A04 JP28255 SOKOSHIN そくしん 赤 illic DG 赤 illic  
 J\_A07 JP28355 AO\_AKI\_DAIZU 南青大豆 YW  
 J\_A03 JP28255 SHITSUMI\_TCVAMA\_ZAIRAI 白提 赤 illic YW 赤 illic  
 J\_A08 JP29441 SHIFUKU\_ZAIRAI\_SENBATSU 紫福在来選抜 YW  
 J\_A08 JP29437 CHINOMIYA\_ZAIRAI\_3 一の宮在来 YW  
 J\_A07 JP29311 SAYAMA\_5 佐山5号 YW  
 JPO JP2829 OOHAMA\_DAIZU 大浜大豆 赤 illic YW 赤 illic  
 J\_A10 JP28781 ABE\_ZAIRAI\_90 矢部在来90 CG  
 JPO JP29460 AO\_NIBU 青いぶ CG YW  
 J\_A07 JP0896 AOMAME アオマメ GR  
 J\_A04 JP28947 SHIMO\_HISAKATA\_DAIZU 下久壁大豆 YW  
 J\_A10 JP81635 DAIZU だいず YW  
 JPO JP28781 AKASAYA\_ZAKOU 赤英 赤 illic YW 赤 illic  
 J\_A04 JP73213 COL\_NAGANO\_1989\_MAFF\_001 COL長野1989 Y  
 J\_A03 JP28754 SHAKKIN\_NASHI 借金ナシ 赤 illic YW 赤 illic  
 J\_A03 JP73038 WASEMAME ワセマメ YW  
 J\_A03 JP73030 KOMAME コマメ YW  
 J\_A04 JP2945 UEDA\_TAIRYU\_MEIRO\_1 上田粒粒白 赤 illic YW  
 J\_A04 JP28327 HINA\_DAIZU 日名大豆 YW  
 J\_A06 JP29225 COL\_GIFU\_1984\_OGURI\_6 COL岐阜1984 BK  
 J\_A06 JP213457 HCHIRIKOBASHI 七かりコバシ YW  
 J\_A04 JP23248 TOGAKUSHI\_KURODAIZU 阿蘭黒大豆 BK  
 J\_A04 JP208679 KUROMAME クロマメ BK  
 J\_A04 JP73174 KUROMAME クロマメ BK  
 J\_A04 JP73173 SUMAME スマメ BK  
 J\_A07 JP110305 KURODAIZU クロダイズ BK  
 J\_A04 JP27954 AKASHIRAHAN 赤生豆 YW  
 J\_A06 JP29242 ZAIRAI\_51-6 在来51-6 RB  
 J\_A06 JP213428 CHAMAME チャマメ RB  
 J\_A10 JP29533 BAN\_KURO\_DAIZU 晩黒大豆 BK  
 JPL JP29535 Kurodazu 晩黒大豆 BK  
 J\_A03 JP76501 KUROMAME クロマメ BK  
 J\_A02 JP27928 KAZUNOKO\_MAME 数の子 赤 illic YW 赤 illic  
 J\_A02 JP85549 KURUMIMAME くるみ豆 YW  
 J\_A02 JP211759 AOBATUMAME アオハツマメ GR  
 J\_A02 JP85548 YAKOUMAME 蔞豆 GR  
 J\_A01 JP81624 YUKONOSHITAMAME 千ノタマ 赤 illic GR 赤 illic  
 J\_A02 JP87838 DADACHAMAME だだチャマメ GR  
 J\_A02 JP87835 HIDENMAME ひでん豆 GR  
 J\_A02 JP87831 KAORIMAME かおり豆 GR  
 J\_A02 JP87828 KAORIMAME かおり豆 GR  
 J\_A02 JP29358 EYOUTOU\_SHUSHITOU 1 厚肉茶豆 1号 YW  
 J\_A02 JP27574 HIKAGE\_MAME 日陰豆 赤 illic YW 赤 illic  
 J\_A04 JP73044 GINNANMAME ぎんなん豆 YW  
 J\_A02 JP76544 KANEMOCHIMAME かねもち豆 YW  
 J\_A03 JP229422 CHICHIBU\_ZAIRAI 秩父在来 YW  
 J\_A03 JP76502 MISOMAME ミソマメ YW  
 J\_A02 JP73138 MISOMAME ミソマメ YW  
 JPL JP27886 Miyagishirome ミヤギシロメ 赤 illic YW 赤 illic  
 KP JP29496 URONKON コロンコン GYBK Saddle  
 KP JP27596 SONJISEKOU ソンジセコ GYBK Saddle  
 J\_A02 JP27938 AKAKURA\_MAME 赤黒豆 YW  
 J\_A02 JP211743 AKAMAME アカマメ GR  
 J\_A02 JP87833 SAKURAMAME さくら豆 RB  
 J\_A04 JP208725 KUROMAME クロマメ BK  
 J\_A02 JP76559 KURODAIZU クロダイズ BK  
 J\_A02 JP76555 TITSUBA イツツバ BK  
 J\_A02 JP76515 KUROMAME クロマメ BK  
 J\_A02 JP76513 TITSUPPAMAME イツツバマメ BK  
 J\_A02 JP28214 KUROGOYOU 黒五徳 BK  
 J\_A02 JP76583 KURUMAME クロマメ BK  
 J\_A02 JP73134 KURONAMIE 黒豆 くるまめ トラマメ BK  
 J\_A02 JP7655 KUROGOYOU クロゴヨウ BK  
 J\_A04 JP211721 TOYOSAKAMAME トヨサカマメ BR  
 J\_A04 JP211726 TYAMAME チャマメ BR  
 J\_A04 JP29188 KOMAI\_DADACHA 小真木だだチャ BR  
 J\_A02 JP21938 KOUCHA 新種 赤 BR  
 J\_A07 JP29367 CHAKAOR 茶かほり エダマメ BR  
 J\_A04 JP211718 NAKATETYAMAME ナカチャマメ BR  
 J\_A10 JP29492 DOYOU\_MAME 土用豆 RB  
 J\_A02 JP85530 KARUMIMAME かるみ豆 Y  
 J\_A02 JP28046 KIZUKURI\_ZAIRAI 木遣在来 YW  
 JPC Other Iwaikuro いわいにく BK  
 J\_A02 JP85537 KUROMAME クロマメ BK  
 J\_A02 JP85529 KUROMAME クロマメ BK  
 J\_A02 JP8536 KUROMAME クロマメ BK  
 J\_A01 JP27708 BANSEI\_HIKAKIKURO 長光黒豆 BK 赤 illic  
 J\_A02 JP76560 HITASHIMAME ヒタシマメ GR  
 J\_A02 JP28869 DATE\_CHA\_MAME 伊達茶豆 GYBR Saddle  
 J\_A02 JP35245 HACHIGATSU\_MAME\_L\_92 八月豆 赤 illic GR 赤 illic  
 J\_A10 JP76326 KOISHIWARA\_ZAIRAI\_90C 小石原在来90C GYDR Saddle  
 J\_A06 JP29253 ZAIRAI\_51-2 在来51-2 GR  
 J\_A02 JP27845 OBNONAI\_ZAIRAI 生徳在来 GR  
 J\_A02 JP76510 KUROMAME クロマメ BK  
 J\_A02 JP73061 KUROMAME クロマメ BK  
 J\_A04 JP28339 TORA\_DAIZU 鱒大豆 RB  
 J\_A03 JP48668 YAGATATECHI\_SHIMOOGAWA 青御前 山形町下小川 赤 illic GR 赤 illic  
 JPO JP27915 DATE\_AO 伊達青豆 赤 illic YW 赤 illic  
 J\_A02 JP76551 AOBATAMAME アオハツマメ 赤 illic GR 赤 illic  
 J\_A03 JP76660 UJIE\_ZAIRAI\_SHIRO\_HANA 氏家在来 白花 BK  
 J\_A02 JP7657 KUROMAME くるまめ BK  
 J\_A02 JP73062 MISOMAME ミソマメ YW  
 J\_A03 JP73151 AOBATA アオバタ YW  
 J\_A03 JP73148 YUGAKIMAME ユガキマメ GR  
 J\_A04 JP28748 Adaizu アダイズ YW  
 J\_A02 JP81627 KURONAMIE クロマメ BK  
 CN JP8660 MUDANJIAN 牡丹江 BK  
 JPO JP49453 CHUUSEI\_HIKARIKURO 中生光黒豆 赤 illic BK 赤 illic  
 J\_A04 JP29072 AO\_CHOUHIN\_5 青長品5号 GR  
 J\_A04 JP73153 SHITASHI\_MAME シタシマメ DG  
 J\_A02 JP76545 KUROMAME クロマメ BK  
 J\_A03 JP23055 KUROMAME クロマメ BK  
 J\_A03 JP73035 KURODAIZU クロダイズ BK  
 J\_A04 JP29059 FUJIMI\_ZAIRAI 富士見在来 GR  
 J\_A04 JP211737 AOMAME アオマメ DG  
 J\_A04 JP08962 KOMAME コマメ GR  
 J\_A03 JP218859 COL\_GUNMA\_2001\_HIRASHIMA\_1 COL群馬2001 YWDR Saddle  
 J\_A08 JP28540 KURAKAKE\_DAIZU\_1 クラカケ大豆\_1 GYDR Saddle  
 J\_A03 JP28980 KURAKAKE くらかけ YWBK Saddle  
 J\_A04 JP29191 SHINANO\_KURAKAKE 信濃桜餅 GYDR Saddle  
 J\_A04 JP29038 CHOUHIN\_HITASHI\_3 長品5号 GYDR Saddle  
 J\_A04 JP73153 NORIMAME ノリマメ YW  
 J\_A04 JP208667 KURAKAKE クラカケ GYDR Saddle  
 J\_A07 JP110287 HANGURO ハンクロ GYDR Saddle  
 J\_A04 JP29035 CHOUHIN\_HITASHI\_2 長品5号2号 YW  
 J\_A04 JP23248 TOGAKUSHI\_KURAKAKE\_HITASHIMAME 厚肉くらかけ黒豆 GYDR Saddle  
 CN JP29408 WAKYOSH KURAKAKE 大沢 赤豆 赤豆 赤豆 GYDR Saddle

Hakkou

J5a: A4-A8 regions

[IIb-Vc, DF52(9), FH69(6), PH69(15), SW28(5), Yellow white seed]

Akisengoku

J5b: A3-A10 regions

[IIb-IVc, DF57(6), FH74(8), PH80(14), SW32(5), Colored seed]

J5c: A2, A4, A6 regions

[IIIc, DF52(7), FH80(4), PH81(43), SW45(10), Colored seed]

J5d: A2-A4 regions

[Ib-IIIc, DF44(4), FH66(10), PH55(11), SW42(10), Colored seed]

Miyagishirome

Five leaves soybean

Iwaikuro

J5e: A2-A4 regions

[IIIc, DF49(8), FH76(8), PH72(19), SW41(7), Flat colored seed

(Green cotyledon)]

Saddle pattern seed soybean

Saddle pattern seed soybean

- J\_A04\_JP29038 SHINANO, KURAKAKE 信濃産 黒豆 GYDBRSaddle
- J\_A04\_JP29038 CHOUHIN, HITASHI 5 長品産5号 GYDBRSaddle
- J\_A04\_JP29038 NIRMAME 八木 産 GYDBRSaddle
- J\_A04\_JP29038 KURAKAKE クラカケ GYDBRSaddle
- J\_A07\_JP110287 HANGURO ハングロ GYDBRSaddle
- J\_A04\_JP29035 CHOUHIN, HITASHI 2 長品産2号 GY
- J\_A04\_JP22248 TOGAKUSHI, KURAKAKE, HITASHIMAME 戸隠くさけ漬し GYDBRSaddle
- J\_A08\_JP29445 YOSHIO, KURAKAKE, DAIZU 秋吉産大豆 GYDBRSaddle
- J\_A03\_JP76503 AOGOZEN アオゴゼン GY
- J\_A02\_JP73066 HIYAKASHIMAME ヒヤカシマメ GR
- J\_A04\_JP28229 KURO, SAKIGAKE 黒船 BK
- J\_A02\_JP27274 GOISHI, SHIROHANA 碧石白花 BK
- J\_A02\_JP76563 HITASHIMAME 2 ヒタシメ GR
- J\_A02\_JP28033 AKITA, ZAIRAI 秋田産来2号 GR
- J\_A04\_JP28766 HITASHI, MAME 浸豆 丸 GYDBRSaddle 丸 GY
- J\_A04\_JP29042 CHOUHIN, HITASHI 9 長品産9号 GYDBRSaddle
- J\_A04\_JP29042 CHOUHIN, HITASHI 9 長品産9号 GYDBRSaddle
- J\_A04\_JP29043 CHOUHIN, HITASHI 10 長品産10号 GY
- J\_A06\_JP28230 GOISHI, MAME, ZAIRAI 碧石産 黒豆 BK
- J\_A02\_JP28551 KURUMAME 黒豆 BK
- J\_A02\_JP76543 BITTARAMAME ヒツタラムメ BK
- J\_A02\_JP76543 BITTARAMAME ヒツタラムメ BK
- J\_A04\_JP73043 HITASHIMAME ヒタシマメ GR
- J\_A02\_JP76575 AUOMAME あおまめ GR
- J\_A03\_JP76500 AOMAME アオマメ GR
- J\_A02\_JP90989 AOTOKO アトコ GR
- J\_A02\_JP73065 AOMAME アオマメ GR
- J\_A02\_JP76579 AODAIZU アオダイズ GR
- J\_A02\_JP73137 BETTARA, MAME ベツタラムメ GR
- J\_A02\_JP73123 AOMAME アオマメ GR
- J\_A02\_JP76509 KURAKAKE クラカケ GR BK Saddle
- J\_A02\_JP72740 BITTARA, MAME ヒツタラムメ GR
- J\_A02\_JP76516 AOMAME アオマメ GR
- J\_A02\_JP27862 AO, BISHI 青豆 GR
- J\_A02\_JP73116 KURUMAME クロマメ BK
- J\_A08\_JP29452 GANAKU, MAME 甘くない豆 BK
- J\_A02\_JP27863 KUROHITA 黒豆 BK
- J\_A04\_JP73054 NIZAIMAME ニサイマメ GY
- J\_A04\_JP29064 CHINO, ZAIRAI 4 芽野産来 4 GY
- J\_A04\_JP73156 HITASHIMAME ヒタシマメ 丸 GY 丸 GY
- J\_A05\_JP29120 KURO, DAIZU 2, TOCHIGI 黒大豆2号 栃木 BK
- J\_A02\_JP76548 KURUMAME クロマメ BK
- J\_A02\_JP28554 KURUMAME 黒豆 BK
- J\_A05\_JP28308 COL, FUKUJI 1983, MAWAKI 1 黒豆 1983 BK
- J\_A10\_JP29272 SHICHIOU, ZAIRAI 833 七瓶産 833 BK
- J\_A10\_JP29272 SHICHIOU, ZAIRAI 833 七瓶産 833 BK
- J\_A05\_JP28257 ZENKOUJI 善光寺 BK
- KR\_JP29955 KLS\_123-1 KLS\_123-1 BR
- KR\_JP29803 HEUKDAELIP 黒大豆 BK
- J\_A08\_JP76845 KURODAIZU クロダイズ 丸 GY 丸 GY
- J\_A07\_JP110306 DAIZU だいず YW
- J\_A02\_JP76834 KURUMAME クロマメ BK
- J\_A02\_JP90908 DAIZU だいず YW
- J\_A07\_JP90897 KURODAIZU クロダイズ BK
- J\_A06\_JP29235 ZAIRASHU 在来種 丸 BK
- J\_A09\_JP81620 KURODAIZU クロダイズ BK
- JPC\_Other Kurodamaru クロダマル BK
- J\_A02\_JP28466 SANBON, ISHOU 三本一升 Y
- J\_A04\_JP28812 OGURA, DAIZU 小倉大豆 YW
- J\_A04\_JP28758 SASAGA, ZAIRAI 841 笹笠産来 晩 YW
- J\_A04\_JP28320 KADEN, SHIRAI 在来種 丸 YW
- J\_A04\_JP28596 ZAIRASHU 2 在来種 2 YW
- J\_A04\_JP28946 KAKIHEI, ZAIRAI 7 柿平産来7号 YW
- J\_A02\_JP28464 KOJI, IRAZU 短いらす YW
- J\_A10\_JP85523 KURODAIZU クロダイズ BK
- J\_A07\_JP110318 SHIRODAIZU シロダイズ YW
- J\_A07\_JP90911 DAIZU だいず BK
- J\_A07\_JP147176 COL, TANBA 1989, ODAGAKI 1 黒豆 1989 YW
- J\_A06\_JP29255 NAGAKUTE, CHAMAME 長久手茶豆 BR
- J\_A04\_JP28867 MAEDAMURA, ZAIRAI 前田村産 BK
- J\_A08\_JP28957 HIROSHIMA, KURO, DAIZU 広島産丸 丸 BK 丸 GY
- J\_A08\_JP85546 CHAMAME チヤマメ YWBR Saddle
- J\_A04\_JP280687 CHAMAME チヤマメ BR
- J\_A09\_JP81623 DAIZU だいず BK
- J\_A09\_JP73068 KURUMAME クロマメ BK
- J\_A09\_JP29414 COL, EHIME 1983, UTSUNOMIYA 32 黒豆 1983 BK
- J\_A10\_JP76322 MAETSUE, ZAIRAI 90C 前津江産 90C BK
- J\_A07\_JP90903 KURUMAME クロマメ BK
- J\_A07\_JP90910 DAIZU だいず BR
- J\_A10\_JP76306 YABE, ZAIRAI 90C 矢部産 90C BK
- J\_A10\_JP85522 KURUMAME クロマメ BK
- J\_A10\_JP76327 KOISHIWARA, ZAIRAI 90C 小石原産 90C BK
- J\_A10\_JP76323 HOUSHUYAMA, ZAIRAI 90A 宝珠山産 90A BK
- J\_A10\_JP29711 IITSUKI, ZAIRAI 83A 五十木産 83A BK
- J\_A05\_JP76508 KURUMAME クロマメ BK
- J\_A05\_JP21928 KURUMAME 黒豆 BK
- J\_A08\_JP87841 KURODAIZU クロダイズ 丸 GY 丸 GY
- J\_A02\_JP27891 KUROTOME 黒登米 BK
- J\_A03\_JP29426 HATAYAMA, MAMEDO, ZAIRAI 鳩山大豆産来 BK
- J\_A03\_JP29426 SHUKUNE, ZAIRAI 宿根産 BK
- J\_A05\_JP21928 KURUMAME 黒豆 BK
- J\_A09\_JP29426 COL, EHIME 1983, UTSUNOMIYA 31 黒豆 1983 BK
- J\_A03\_JP73149 KURUMAME クロマメ BK
- J\_A09\_JP225420 COL, EHIME 2002, KIKUCHI 2 黒豆 2002 BK
- J\_A07\_JP29359 TANBA, KURO 丹波黒 丸 GY 丸 GY
- J\_A06\_JP21345 KURUMAME クロマメ BK
- J\_A08\_JP87847 KURUMAME クロマメ BK
- J\_A07\_JP233887 DAIZU 大豆 YWBR Saddle
- J\_A07\_JP110336 KURUMAME クロマメ BK
- J\_A09\_JP225423 COL, KAGAWA 2002, SARUTA 2 黒豆 2002 BK
- J\_A10\_JP87831 YABE, ZAIRAI 90C 矢部産 90C BK
- J\_A07\_JP90916 DAIZU, KURO だしず, クロ BK
- J\_A09\_JP225428 COL, KAGAWA 2002, SARUTA 7 黒豆 2002 BK
- JPL\_JP49594 Shintanbakuro 新丹波黒 丸 GY 丸 GY
- J\_A07\_JP90905 KURUMAME クロマメ BK
- J\_A07\_JP90890 COL, WAKAYAMA 1997, CED, NIAR 97081 黒豆 1997 BK
- J\_A07\_JP147175 COL, TANBA 1989, ODAGAKI 2 黒豆 1989 BK
- J\_A07\_JP49575 TANBA, KURO, YAMAGATA 1987 丹波黒 山形 1987 BK
- J\_A07\_JP49593 TANBAKURO, OOGATA 1988 丹波黒 大潟 1988 BK
- J\_A09\_JP29415 COL, EHIME 1983, UTSUNOMIYA 30 黒豆 1983 BK
- J\_A09\_JP225427 COL, KAGAWA 2002, SARUTA 4 黒豆 2002 BK
- J\_A10\_JP76311 AMAGI, ZAIRAI 90B 甘木産 90B BK
- J\_A07\_JP90899 KURUMAME クロマメ BK
- JPL\_Other Hyoukeikuro3 兵系黒3号 GY
- J\_A07\_JP110335 AODAIZU アオダイズ GY
- J\_A08\_JP29434 CHINOMIYA, ZAIRAI 2 一の産 2 YW
- J\_A08\_JP29435 CHINOMIYA, ZAIRAI 1 一の産 1 YW
- J\_A09\_JP225421 COL, EHIME 2002, KIKUCHI 3 黒豆 2002 GR
- J\_A09\_JP29408 COL, EHIME 1983, UTSUNOMIYA 22 黒豆 1983 GR
- J\_A09\_JP81613 DAIZU だいず GR
- J\_A09\_JP81613 DAIZU だいず GR
- J\_A03\_JP28961 KOSA, SHIRAZU 小笹不知 YW
- J\_A09\_JP227399 COL, EHIME 1-2 黒豆 1-2 BK
- J\_A09\_JP227398 COL, EHIME 1-1 黒豆 1-1 BK
- J\_A09\_JP29413 COL, EHIME 1983, UTSUNOMIYA 28 黒豆 1983 DBR
- J\_A09\_JP29413 COL, EHIME 1983, UTSUNOMIYA 28 黒豆 1983 DBR
- J\_A09\_JP81611 CHAIRONODAIZU 茶色のダイズ DBR
- J\_A09\_JP29410 COL, EHIME 1983, UTSUNOMIYA 25 黒豆 1983 DBR
- J\_A09\_JP225419 COL, EHIME 2002, KIKUCHI 1 黒豆 2002 DBR
- J\_A04\_JP29087 ZAIRASHU, SHOURI 在来種 塩尻 DG
- J\_A02\_JP28067 KURUMAME クロマメ BK
- J\_A05\_JP219288 AOMAME アオマメ GR
- J\_A04\_JP73056 AOMAME アオマメ GY
- J\_A04\_JP73048 NIOMAME ニオマメ GY
- J\_A04\_JP211731 HIRATOKO ヒラトコ BK
- J\_A02\_JP23027 HITASHI, MAME, KINAKI ひとつし 丸 鬼無里 DG
- J\_A02\_JP81630 AOMAME アオマメ 丸 GY 丸 GY
- J\_A07\_JP76664 KASUGA, AODAIZU 春日青大豆 DG
- J\_A04\_JP73226 HITASHIMAME ひとつし DG
- J\_A02\_JP76840 AODAIZU アオダイズ DG
- J\_A02\_JP85549 AOBATAMA あおばたま DG
- J\_A02\_JP85533 AOMAME アオマメ DG
- J\_A02\_JP76511 AOBATA アオバタ DG
- J\_A04\_JP73175 AOMAME アオマメ DG
- J\_A04\_JP28311 AONRYUDOU 舟入通 DG
- J\_A04\_JP73165 AOMAME アオマメ DG
- J\_A03\_JP229430 HITASHIMAME, NAGATORO, ZAIRAI 浸豆 長野産来 DG
- J\_A03\_JP73033 HITASHIMAME ヒタシマメ DG
- J\_A03\_JP46063 AOGOZEN, SUIFUMURA, NAKAZOME 青御前 水府村産 DG
- J\_A02\_JP73063 SAKANAWAME サカナマメ DG
- J\_A02\_JP76512 AOBATSU アオバツ DG
- J\_A04\_JP73160 AOBATSU アオバツ DG
- J\_A04\_JP73157 HITASHIMAME, AOBATSU ヒタシマメ, アオバツ DG
- J\_A05\_JP219279 DAIZU 大豆 DG
- J\_A08\_JP85545 AOYAGI アオヤギ GR
- J\_A02\_JP76511 HITORIMUSUME ヒトリムスメ GY
- J\_A04\_JP208657 DAIZU 大豆 GY
- J\_A09\_JP225429 COL, KAGAWA 2002, SARUTA 8 黒豆 2002 GY
- J\_A07\_JP110288 AODAIZU アオダイズ GY
- J\_A04\_JP73235 YUDOSHIMAME 湯どうしめ GY
- J\_A04\_JP20875 AOMAME アオマメ GY
- J\_A04\_JP73047 OKUMAME オクマメ GY
- J\_A04\_JP73041 HITORIMUSUME ヒトリムスメ GY
- J\_A07\_JP67662 AOAKIMAME 青秋豆 GY
- J\_A07\_JP233889 COL, SHIGA 2007, OKUJIZUMI 11 黒豆 2007 GY
- J\_A07\_JP233890 USHUDA, DAIZU クロダイズ GY
- J\_A07\_JP110309 AODAIZU アオダイズ GY

J5f: A2-A10 regions  
[IVc, DF58(6), FH80(7), PH89(18), SW50(13), Black seed]

Kurodamaru

Shintanbakuro

Hyoukei kuro3

J5g: A2-A10 regions  
[DF55(7), FH79(5), PH80(19), SW42(7), Green seed (Green cotyledon)]

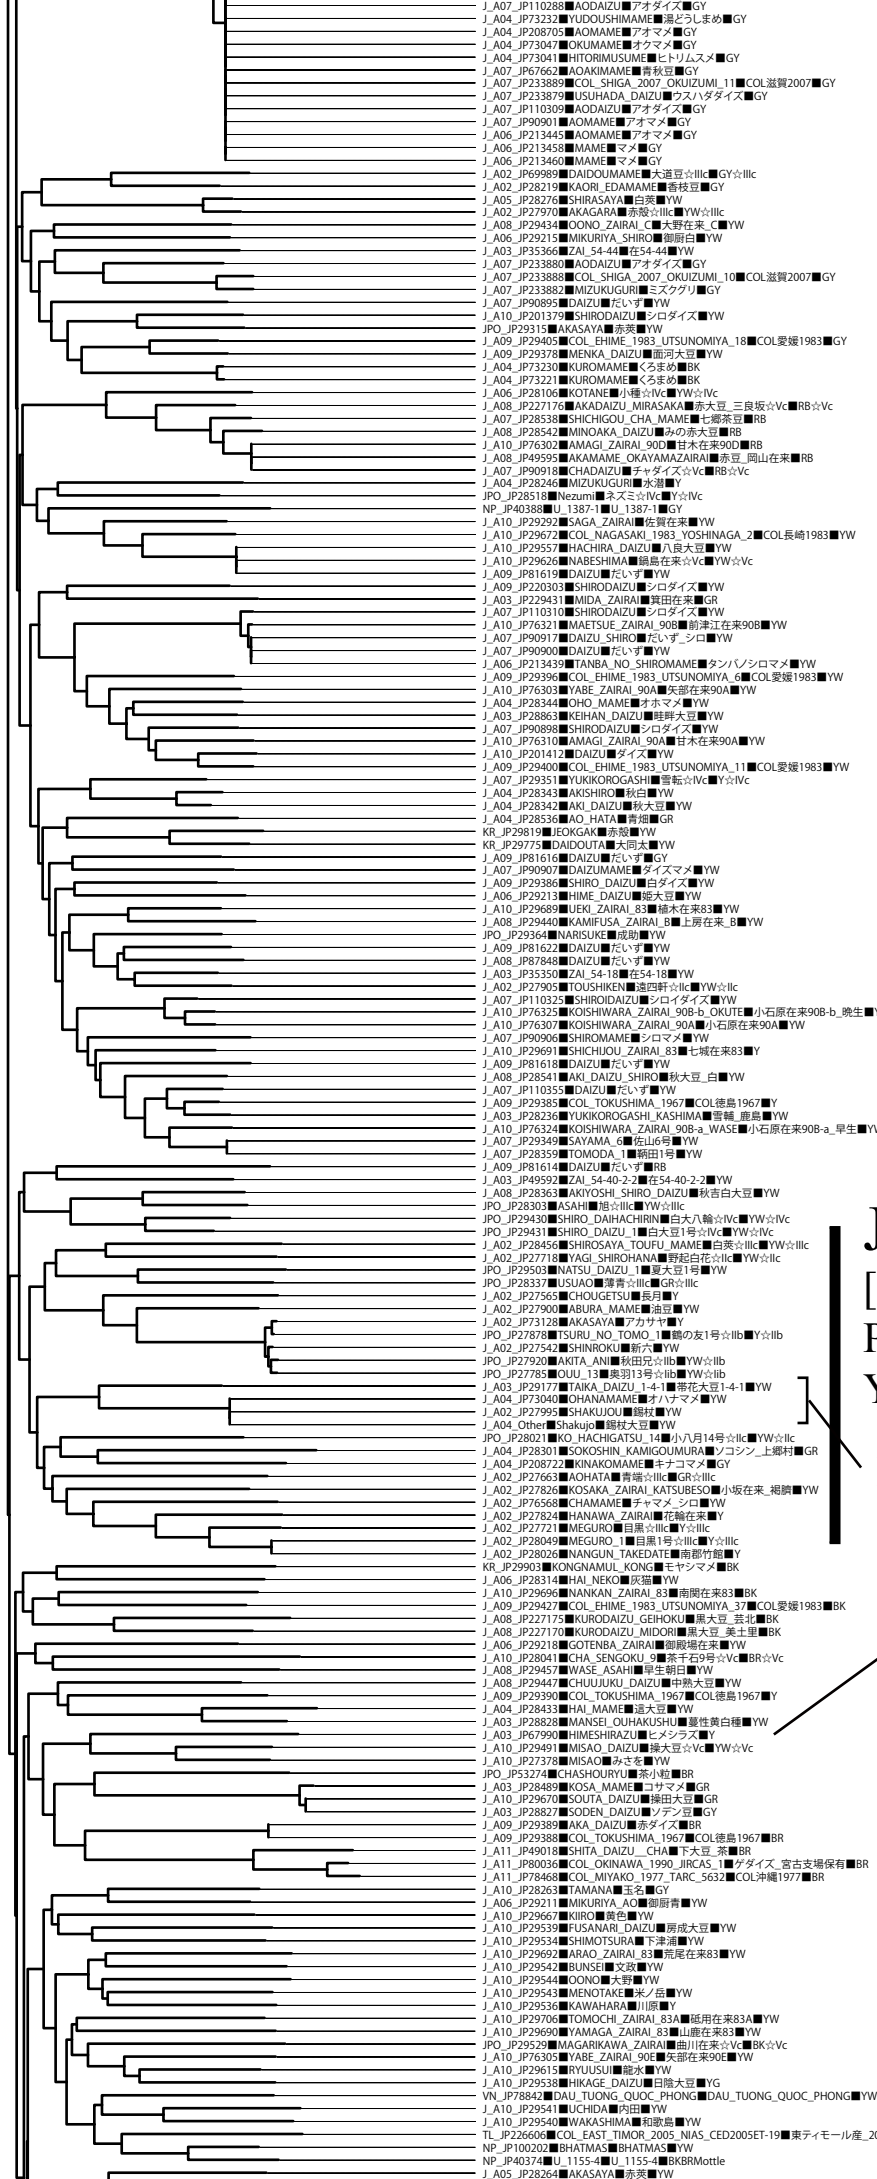

**J5h: A2-A10 regions**  
[IIIc-Vc, DF61(6), FH75(6), PH93(33), SW39(9), Yellow white seed ]

**J6: A2-A4 regions**  
[IIb-IVc, DF52(8), FH67(8), PH69(21), SW27(5), Yellow white seed]

Fasciated soybean

Himeshirazu

**J7: A3-A4, A8-A10 regions**  
[Vc, DF76(22), FH70(6), PH141(68), SW15(7), Colored seed]

**J8: A6-A7, A9-A10 regions**  
[IVc-Vc, DF67(7), FH74(5), PH113(57), SW28(6), Yellow white seed]

WV\_17\_8842 DAUJONG 154 PHONG DAU 154 PHONG QUOC PHONG 154  
J\_10\_10\_19540 WAKASHIMA 種粒色 YW  
TL JP226606 COL\_EAST\_TIMOR\_2005\_NIAS\_CED2005ET-19 東ティモール産 2005ET-19 YW  
NP JP100202 BHATMAS BHATMAS YW  
NP JP40374 L1155-48 L1155-48 BKRRMottle  
J\_A05 JP28264 AKASA 赤実 YW  
J\_10\_10\_19524 HOSHINO\_ZAIRAI 星野在来 YWB/Mottle  
JPO JP29209 SHIRO\_DAIJU 白大豆 YW  
JPO JP29208 IPPON\_SUZUNARI 一本鈴成 YW  
J\_A07 JP29366 SHIMO\_KUSANO 中平野 YW  
J\_A04 JP28547 SHIRO\_DAIJU 白大豆 YW  
J\_10\_10\_19537 OOURA 大浦 YW  
J\_A06 JP29252 ZAIRAI\_51-1-2 在来51-1-2 YW  
J\_A07 JP29363 KOKUBU\_7 国府7号 YW  
JPO JP27959 TAMANSHIRI 玉指 YW  
J\_A09 JP8161 DAIJU 大豆 YW  
J\_A04 JP28278 SADO\_MAME 佐渡豆 YW  
JPC JP29640 Hyuga ヒュウガ YG  
J\_A07 JP28133 IKKI 一木 YW  
J\_A07 JP27665 CHIKINAMIE イチキマ Y  
J\_A09 JP8161 DAIJU 大豆 YW  
J\_A07 JP29307 SENNARI\_A 千成 YW  
J\_A09 JP29384 MIKUNI ミクニ Y  
JPO JP29590 Bansei\_30 晩生30号 YW  
JPO JP28222 Kirookidaiju 黄色秋大豆 YW  
JPO JP29210 YAHAI 養実 YW  
J\_A03 JP35341 ZAL\_54-3 在来54-3 Y  
JPO JP29600 OOTA\_AKI\_DAIJU\_1 大分秋大豆1号 YW  
J\_A06 JP29219 SHUZENJI\_ZAIRAI 修善寺在来 Y  
JPC JP29555 Hougyoku ホウゴク YW  
J\_A08 JP28283 YAMAGUCHI\_AKI\_DAIJU 山口秋大豆 YW  
JPC JP29578 Akiyoshi アキヨシ YW  
J\_10\_10\_192978 TOUYOU\_ZAIRAI\_83A 東陽在来83A YW  
J\_A06 JP29217 NAKAHATA\_ZAIRAI 中畑在来 YW  
JPC Other Murayutaka ムラユタカ YW  
J\_10\_10\_19526 ASO\_ZAIRAI\_83 阿蘇在来83 YW  
J\_10\_10\_1921402 MADAIZU タイズ YW  
J\_10\_10\_191632 COL\_NAGASAKI\_1994\_MAFF\_154 COL長崎1994 YW  
J\_10\_10\_1981633 OSODAIZU オソダイズ YW  
J\_10\_10\_195527 AKIDAIZU アキダイズ YW  
J\_A06 JP213427 SHIRODAIZU シロダイズ YW  
JPC JP29666 Fukuyutaka フクユタカ YW  
J\_10\_10\_1926818 COL\_SAGA\_2005\_NIAS\_CED2005\_42\_27 COL佐賀2005 YW  
J\_10\_10\_1926808 COL\_SAGA\_2005\_NIAS\_CED2005\_39\_46 COL佐賀2005 YW  
J\_10\_10\_1926807 COL\_SAGA\_2005\_NIAS\_CED2005\_39\_45 COL佐賀2005 YW  
J\_A06 JP213438 MAME マメ YW  
J\_10\_10\_1976320 MATSUE\_ZAIRAI\_90A 前津江在来90A BK  
J\_A09 JP225422 COL\_KAGAWA\_2002\_SARUTA\_1 COL香川2002 DG  
J\_A07 JP110329 KURODAIZU クロダイズ BK  
J\_A03 JP28581 IPPON\_SUZUNARI 一本鈴成 YW  
IN JP30402 M\_248 M\_248 YW  
IN JP30349 HM\_39 HM\_39 YW  
J\_10\_10\_1929718 COL\_KAGAWA\_2002\_SARUTA\_3 COL香川2002 Y  
J\_A09 JP225424 COL\_KAGAWA\_2002\_SARUTA\_3 COL香川2002 Y  
J\_A07 JP29294 SHOKUYOU\_AKI\_DAIJU 食用秋大豆 Y  
J\_A06 JP35383 ZAIRAISHU\_51-1\_B\_1 在来種51-1B-1 YW  
KR JP35544 KLS\_606-2 KLS\_606-2 GY  
KR JP29796 GEUMHWAJAE 錦城在来 YW  
J\_A09 JP27668 IYO\_AOGARI 伊予青豆 GY  
J\_A09 JP29488 IYO\_DAIJU 伊豫大豆 GR  
J\_A01 JP27395 UMA\_DAIJU 馬大豆 GR  
JPC JP6777 Suzumaru スズマル YW  
JPL JP6838 Kosuzu コスズ YW  
J\_A02 JP73142 NATTOUMAME ナットウマメ YW  
JPL JP29161 Natoukotsubu 納豆小粒 YW  
KP JP28401 RIKANKAN リカンカン YW  
KR JP35477 HM\_112 HM\_112 Y  
J\_A03 JP6992 GOKUSHU\_KANASAGO\_AKAHANA 極小金砂赤花 YW  
KP JP27956 NEZUMI\_META 鼠目 BK  
KR JP29774 CHUHOKU\_2 忠北2 YW  
J\_10\_10\_1929468 AZE\_DAIJU 畦大豆 YW  
KR JP35560 KLS\_622 KLS\_622 YW  
J\_A02 JP2803 AO\_MAME 青豆 YW  
J\_A03 JP29150 AO\_DAIJU 青大豆 GR  
KR JP29781 SETA 青太 GR  
KR JP29728 CHUNG\_TAI 冲台 GR  
J\_A02 JP28123 JOUHOJU\_ZAIRAISHU 浄法寺在来種 YW  
KR JP35506 KLS\_203 KLS\_203 Y  
KR JP29802 HANKIONGJAEI HANKIONGJAEI YW  
KR JP29787 BUKJAEI HANKYONG BUKJAEI HANKYONG YW  
KR JP29906 KYONGDU 慶豆 YW  
KR JP29801 HANMINAM 咸南 YW  
KR JP29799 HANAM 咸南 YG  
KR JP29762 HEAMNAM 咸南 YW  
KR JP29791 CHUK\_HYEOP 楸英 Y  
KR JP29777 BAEKJAMKONG BAEKJAMKONG YW  
KR JP29766 HAKJU 白太 YW  
KR JP29823 KEUMKONG KEUMKONG YW  
KR JP29767 KINZU 金豆 YW  
TW JP3111 POCHAL POCHAL Y  
KR JP29828 KEUMHWAJAEI KEUMHWAJAEI YW  
KR JP29820 JEONJAEI 全州在来種 YW  
KR JP2981 INCHUNJAEI 仁川在来種 YW  
KR JP29812 CHUNJAEI 川在来種 Y  
KP JP28395 ORUKON オルコン YW  
KR JP29797 GILKEUMKONG GILKEUMKONG Y  
KR JP29792 DANCHUN 檀川 Y  
CN JP30097 MANJITA 漫地太 YW  
KR JP29823 JIUNUNKONG\_DEALIP JIUNUNKONG\_DEALIP YW  
KR JP29813 IKSAN 益山 Y  
KR JP29818 JANGDANBAEKMOK 長端白 YW  
KR JP29790 CHUNGBUKHWANG CHUNGBUKHWANG Y  
KR JP29908 GANDU 甘豆 Y  
KR JP29826 KEUMDANJONG KEUMDANJONG Y  
KR JP29804 ANBYONTAE 安辺太 YW  
KR JP29779 TANSEN\_TANRYOKU 端川淡線 Y  
KR JP28399 HEIJOU 平端 YW  
KR JP29881 OKU 奥豆 YG  
CN JP28415 RIGAL\_SETOU 裏外青豆 GR  
KP JP27595 ANCHUUMU\_RIPAMUKON アンチュムリパムコン BK  
KP JP27589 OARUKON オアルコン YW  
CN JP104184 NIU\_MAO\_HUANG 牛毛黄 GR  
CN JP30011 TEKYOU\_SETOU 鉄城青豆 GY  
CN JP30117 PING\_DING\_XIANG 平頂香 YG  
J\_A04 JP28332 SHOUFUKU\_DAIJU 松福大豆 GY  
CN JP66624 ODADAIZU 小田大豆 GR  
CN JP30029 RANSEI RANSEI YW  
CN JP27596 SHIHEIGAI\_HAKA 四平黑青豆 Y  
CN JP227198 HELENGJIANG\_1-2\_RED 黑龍江省産1-2\_赤 YW  
CN JP86640 QINGDOU 青豆 GR  
CN JP70099 TIAN\_E\_DAN 天鵝蛋 YW  
CN JP30025 HAKUBI 白眉 YW  
CN JP27690 FUKJU 福菊 YW  
CN JP27598 HOUTEN\_HAKU 奉天白眉 YW  
CN JP27691 SOURUSHI 双楼子 YW  
CN JP27597 KINGEN 金元 YW  
CN JP54193 KOUGA\_TENGATAN 蛟河天鵝蛋 Y  
PH JP35788 KE\_32 KE\_32 Y  
CN JP86611 LANGU 狼鼓 YW  
US JP548573 Harosoy Harosoy YW  
CN JP104240 DA\_BAI\_MEI 大白眉 YW  
CN JP86605 CHIHUAZAILAI 赤花在来種 YW  
CN JP227203 HELENGJIANG\_2-2 黑龍江省産2-2 YW  
CN JP227203 HELENGJIANG\_3-3 黑龍江省産3-3 Y  
CN JP227197 HELENGJIANG\_1-1 黑龍江省産1-1 YW  
CN JP107654 FUJ\_NAN\_JI\_FUA\_HEI\_DOU 陳南陳花黑豆 BK  
CN JP35718 ANTO\_SHOUKOUTOU 安図小黒豆 BK  
CN JP3007 KOLZENTOU 科前豆 Y  
CN JP86613 XIANGHUANGKE 小黃殼 YW  
CN JP30071 CHOYOUTOU 猪腰豆 YW  
CN JP35720 KAITETSUKYOU 灰鉄英 YW  
CN JP54200 CHOU\_HAKUSAN 長白山 YW  
CN JP30090 CHIGUJOU 奇菊 YW  
CN JP30100 ZHU\_MIAN\_DOU 猪鬃 YG  
CN JP27543 HAKKA\_ZASHI 白化粧子 YW  
CN JP35719 HAKUCHIKOU 薄地高 YW  
CN JP30111 BE\_DI\_GAO 薄地高 YW  
CN JP20106 SHULIANG 水帘 YW  
CN JP86606 CHILUGOKUSAN 中熟6 YW  
CN JP30013 KONPO\_DAIJU 混保大豆 YW  
ID JP43384 BARITOU\_3\_A バリ島3A YW  
CN JP27692 SHIHEIGAI\_KUROBESO 四平黑青豆 YW  
KR JP29794 GAPSANJAEI 甘山在来種 YW  
US JP15867 Williams\_82 Williams\_82 Y  
CN JP29497 KAIGEN\_HAKKA 開原白花 YW  
CN JP35716 GYU\_SHOKUTOU 牛食豆 Y  
CN JP30019 OUHOSHU 黄宝珠 YW  
CN JP30074 SHOUHAKUTOU 寿白眉 YW  
CN JP3007 SENYOUTOU 参豆 YW  
CN JP30018 GENHOUKIN 冠宝金 YW  
CN JP30020 MANCANGJIN 滿倉金 YW  
PH JP30169 L\_114 L\_114 YW  
IN JP30249 M\_265 M\_265 YG  
TH JP38385 COL\_THAI\_1986\_THAI-78 タイ産THAI-78 YW  
TH JP38388 COL\_THAI\_1986\_THAI-83 タイ産THAI-83 YW

PH113(57), SW28(6),  
Yellow white seed]

Fukuyutaka, Akiyoshi,  
Hougyoku, Murayutaka,  
Erusuta

Suzumaru, Kosuzu, Natoukotsubu

# Exotic soybean cluster

E1: Korean landraces

Harosoy

E2: Chinese  
landraces

Williams 82

E3a



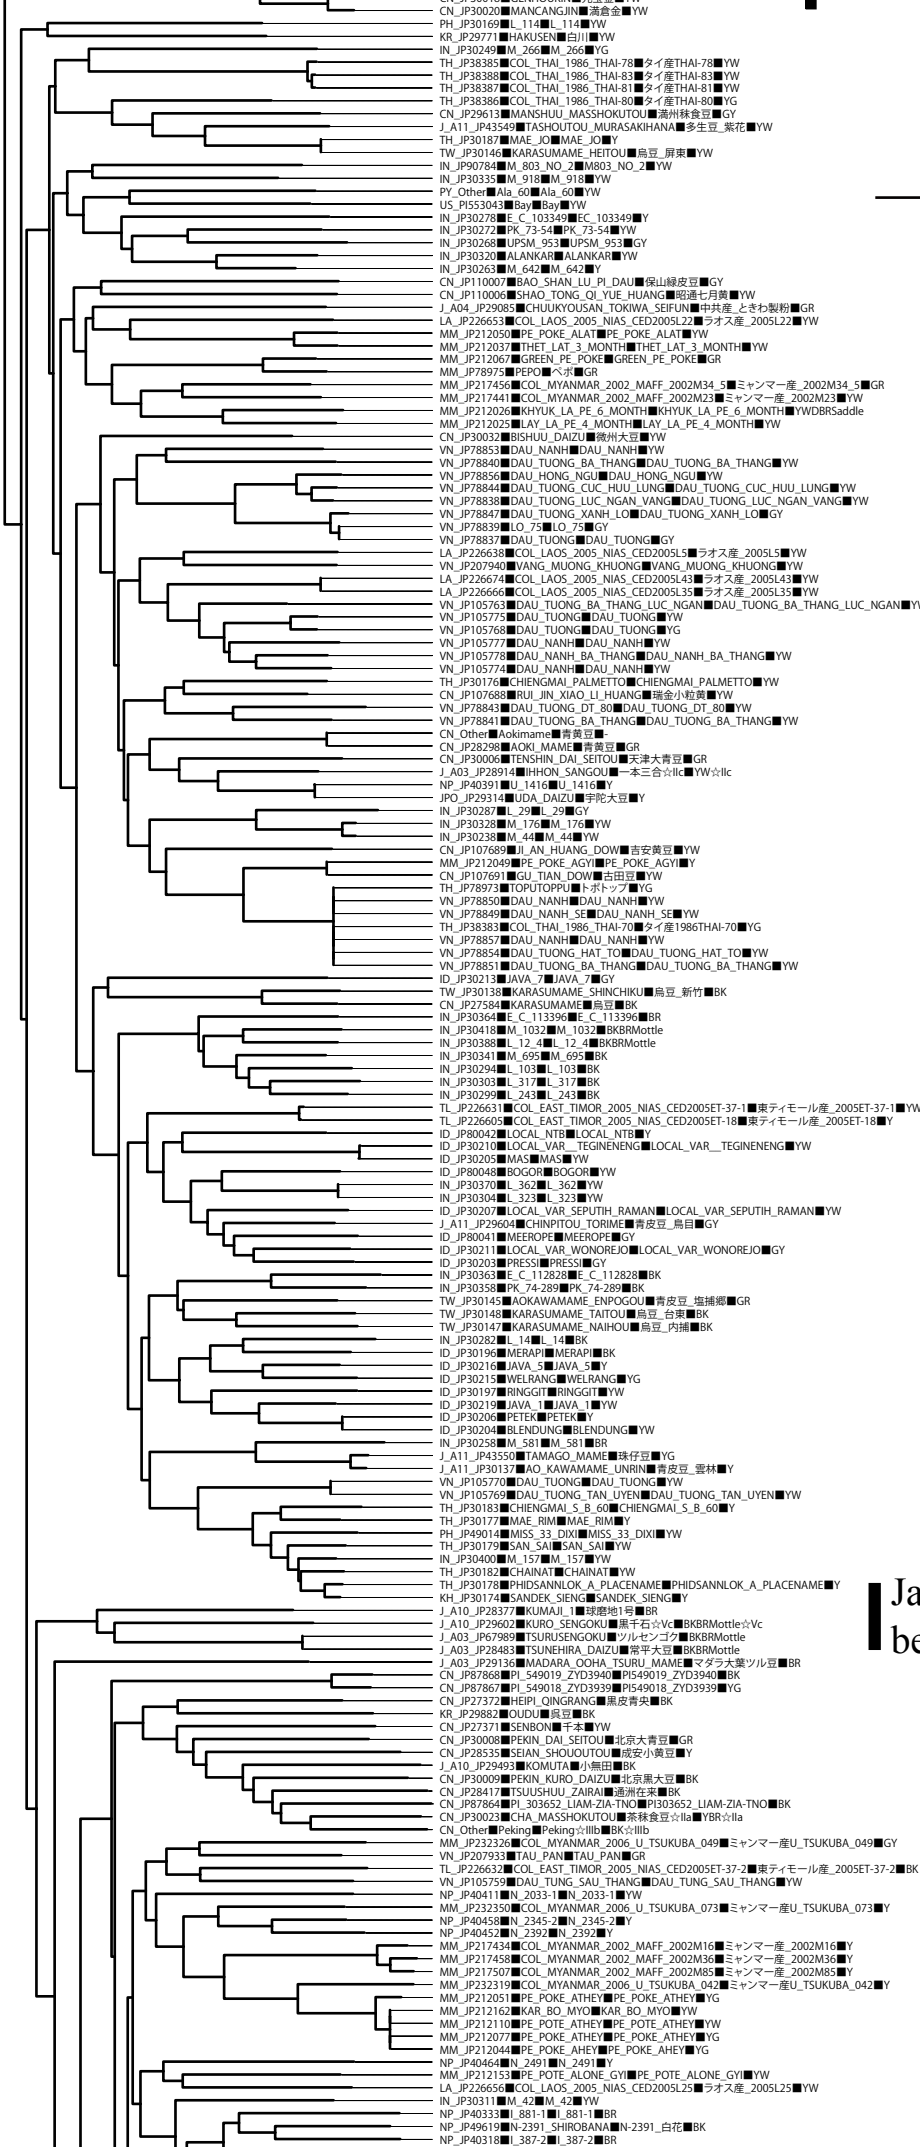

E3a

Bay

E3b

Southeast Asia,  
China and India

E3c

Japanese intermediate soybeans  
between wild and cultivated

E4a

Peking

E4b

Landraces  
from south  
central  
Asia and

E4c

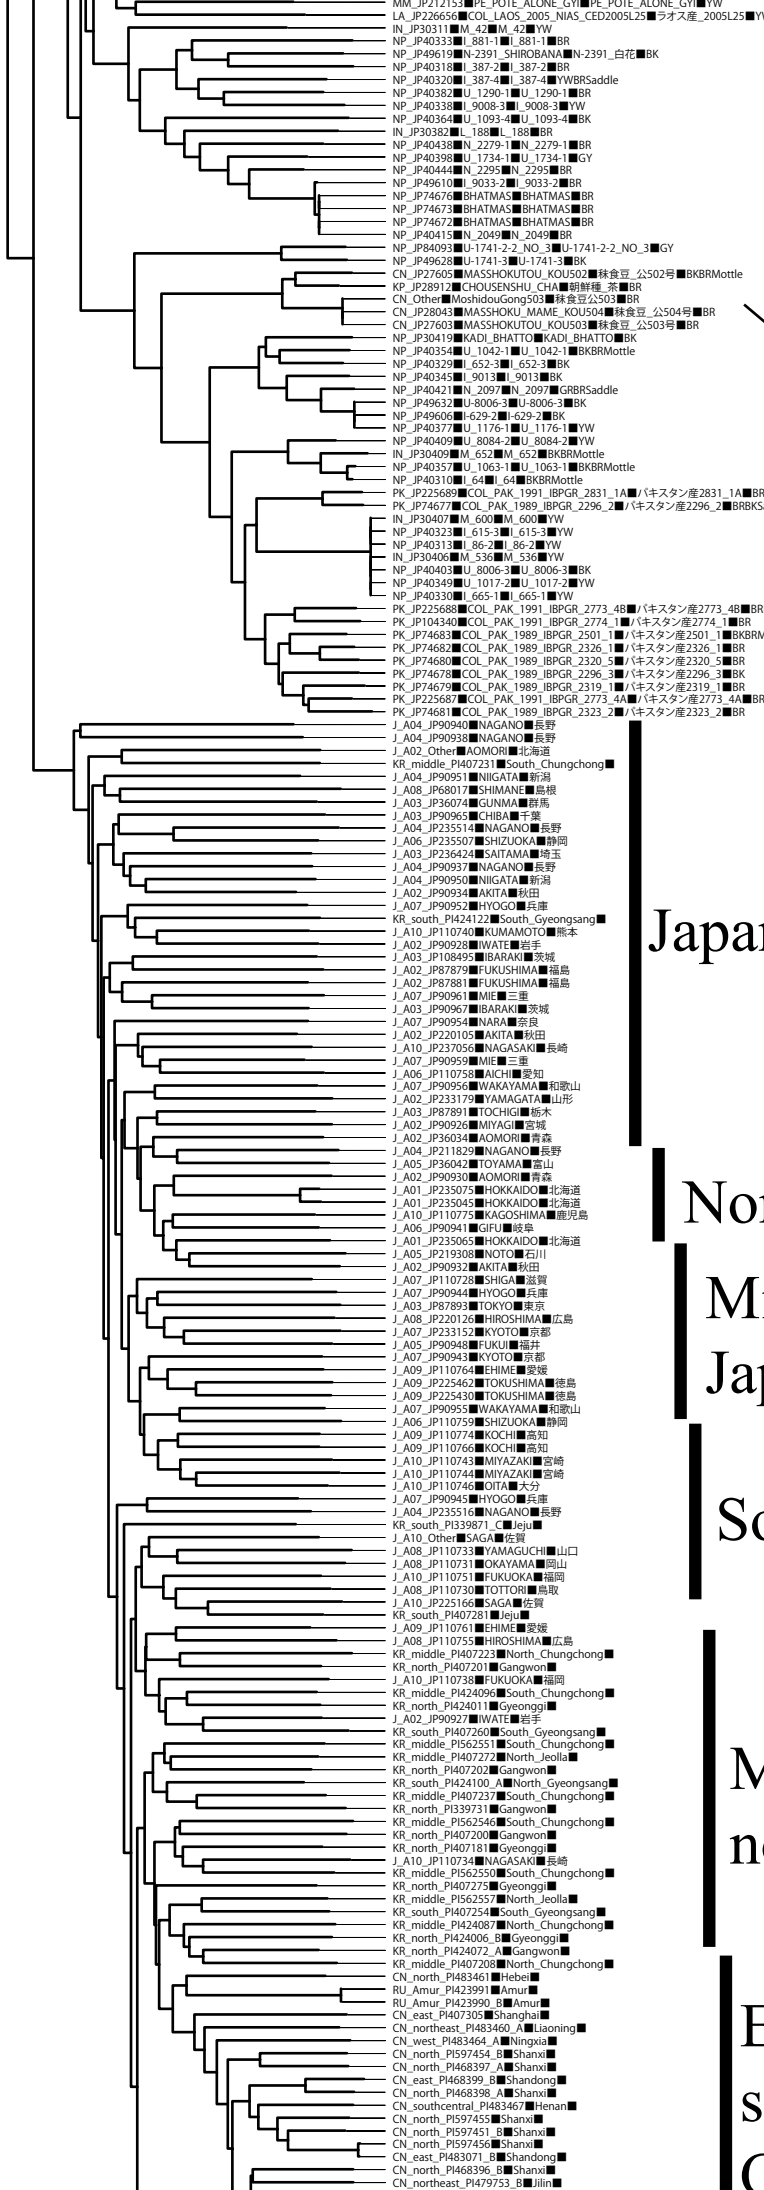

E4c central Asia and China

E4d

Moshidou Gong503

Wild soybean cluster

Japan

North Japan

Middle Japan

South Japan

Middle to north Korea

East, west, south central China

# South central China

## Middle to south Korea

*G. formosa*

## Northeast China and Far East Russia

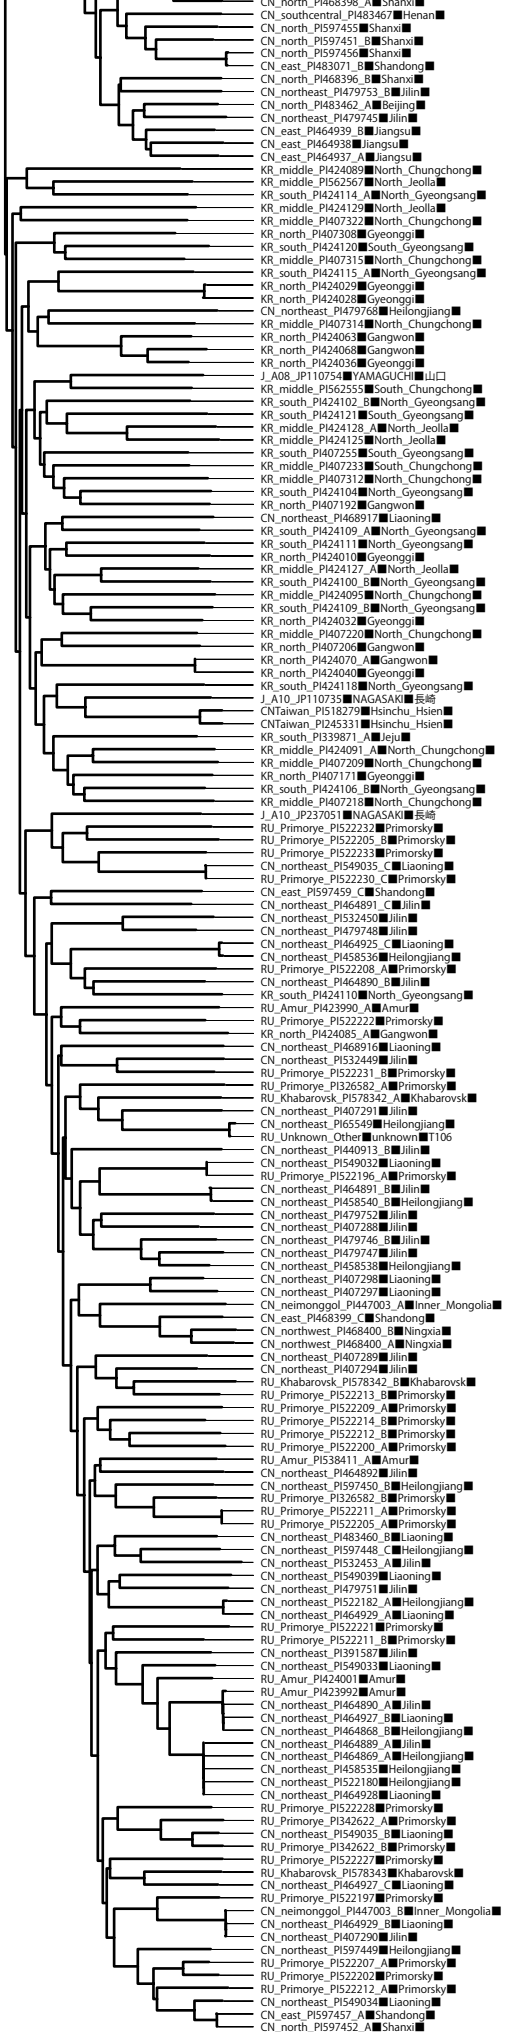

0.1
