# Supplementary figures and images for: Evaluation of soybean germplasm conserved in NIAS genebank and development of mini core collections
Source: PubMed Central journal article supplement — Breed Sci. 2012 Feb 4;61(5):566–92. doi: 10.1270/jsbbs.61.566 (PMC3406788; doi:10.1270/jsbbs.61.566), 2012-02-04

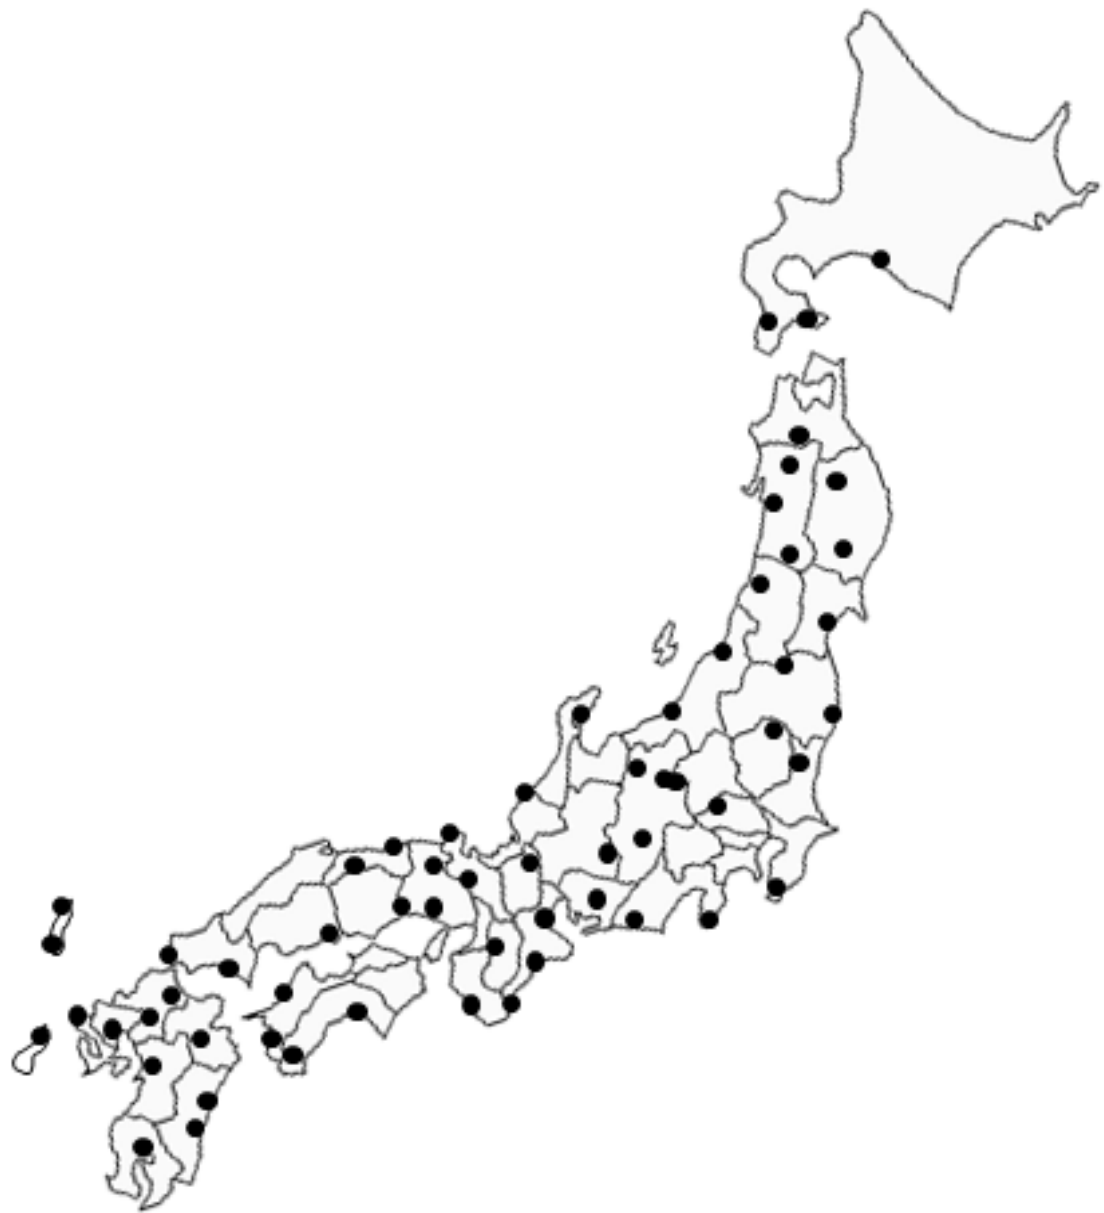

Supplement: 61_566_1.pdf [file 61_566_1.pdf]

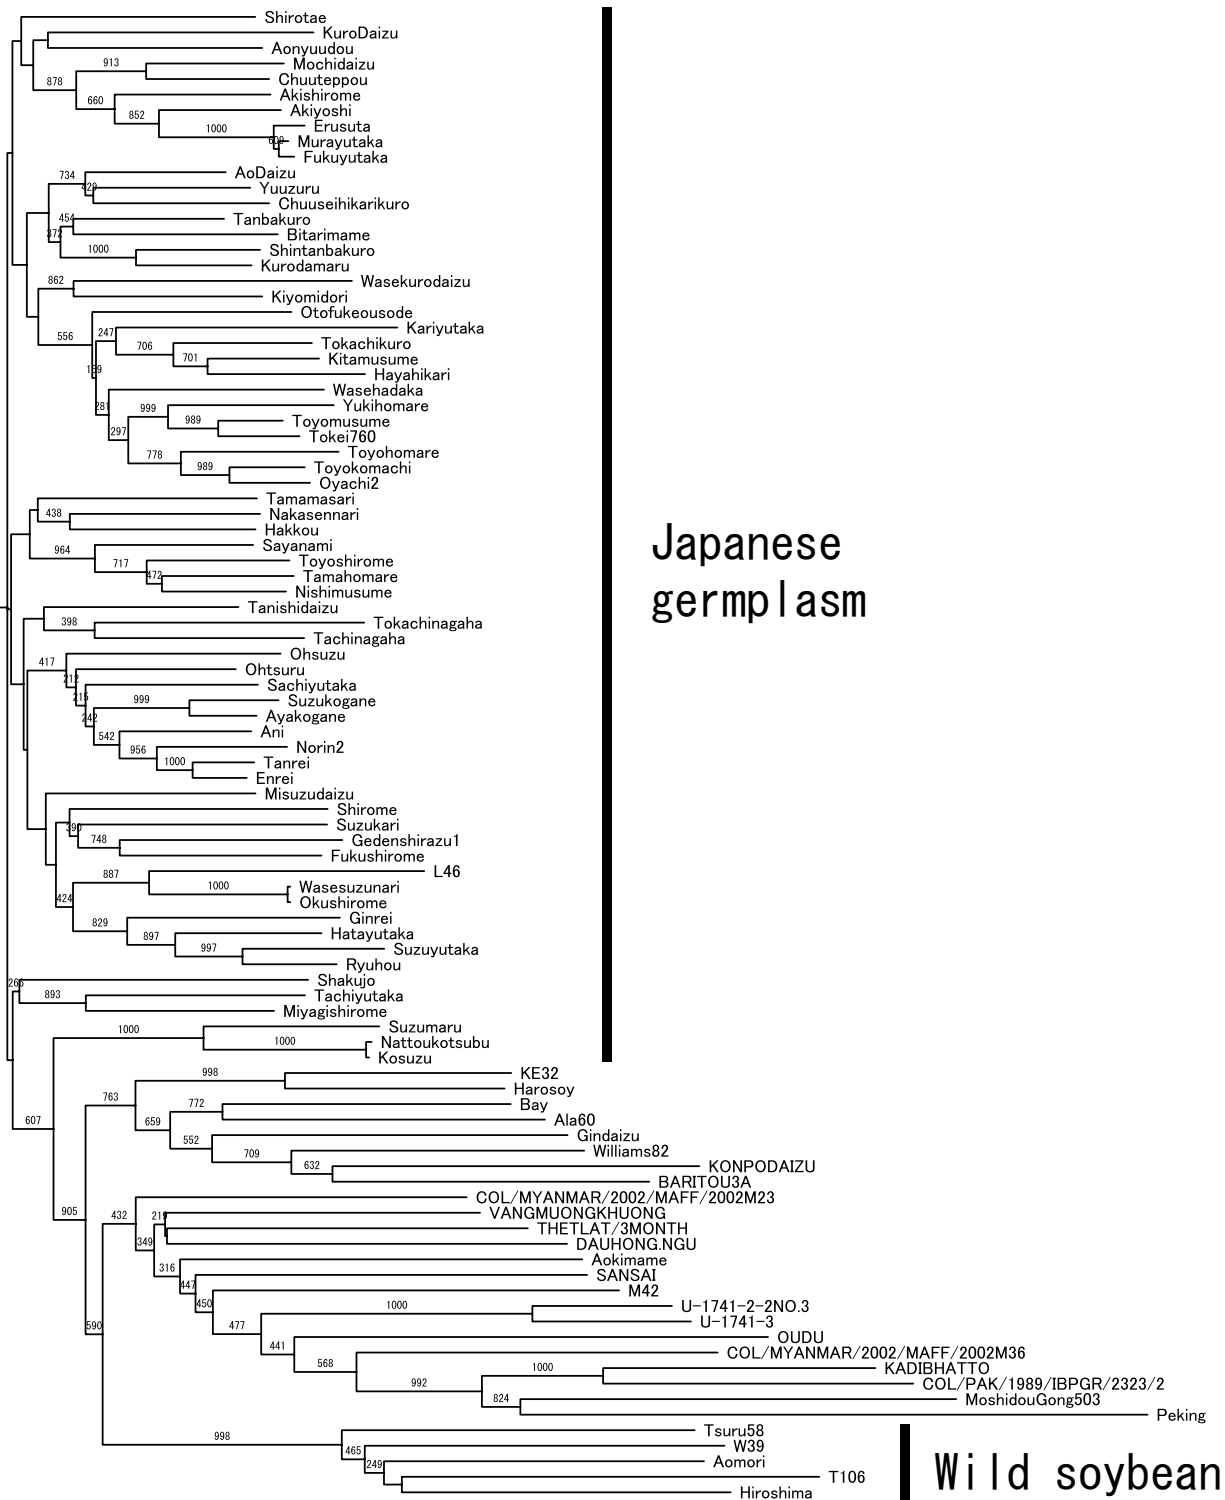

Supplement: 61_566_2.pdf [file 61_566_2.pdf]

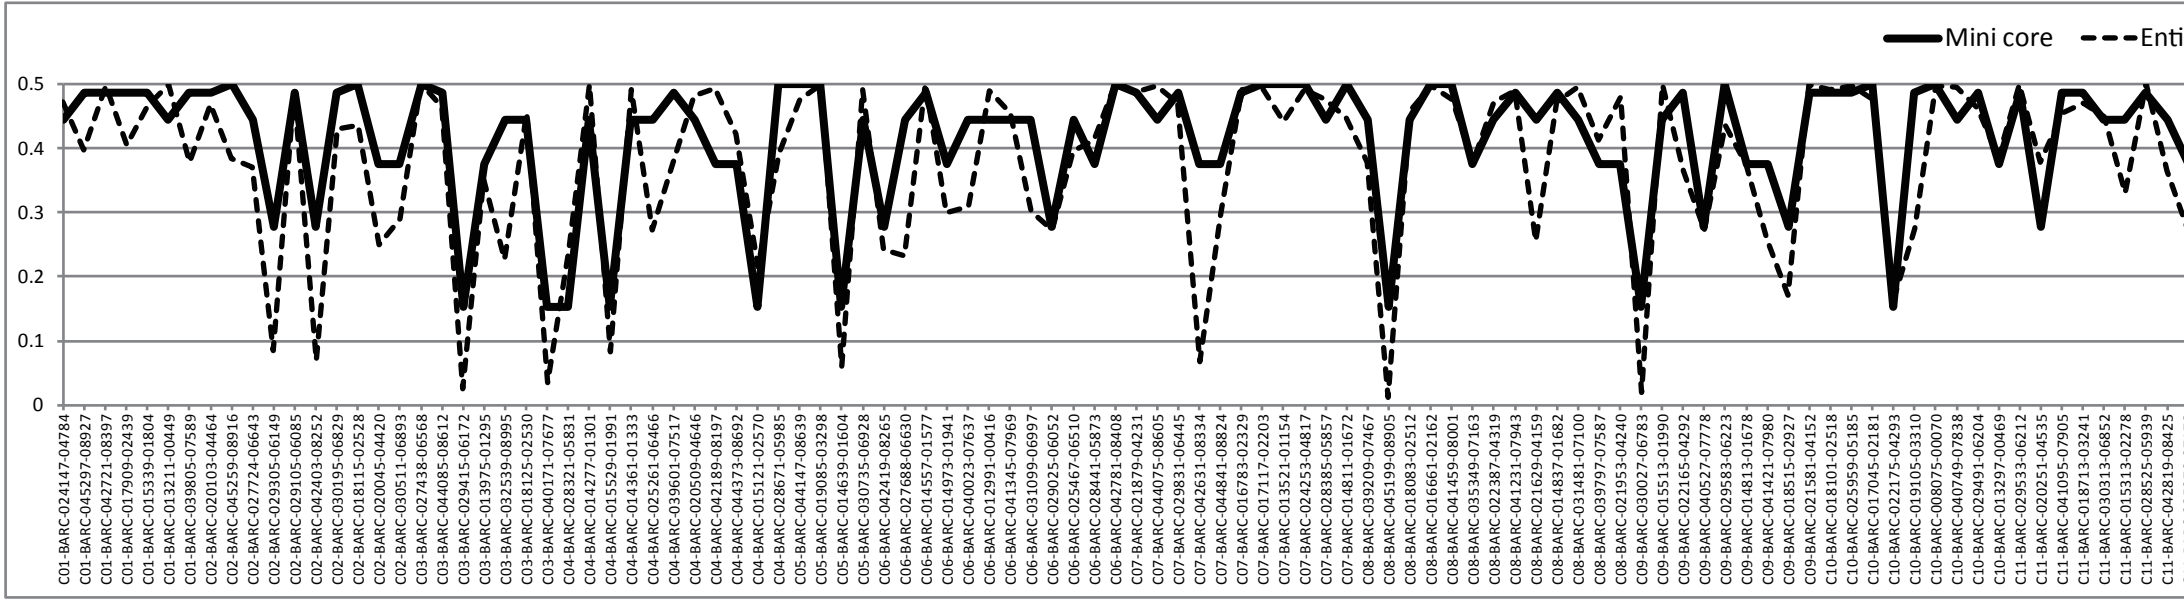

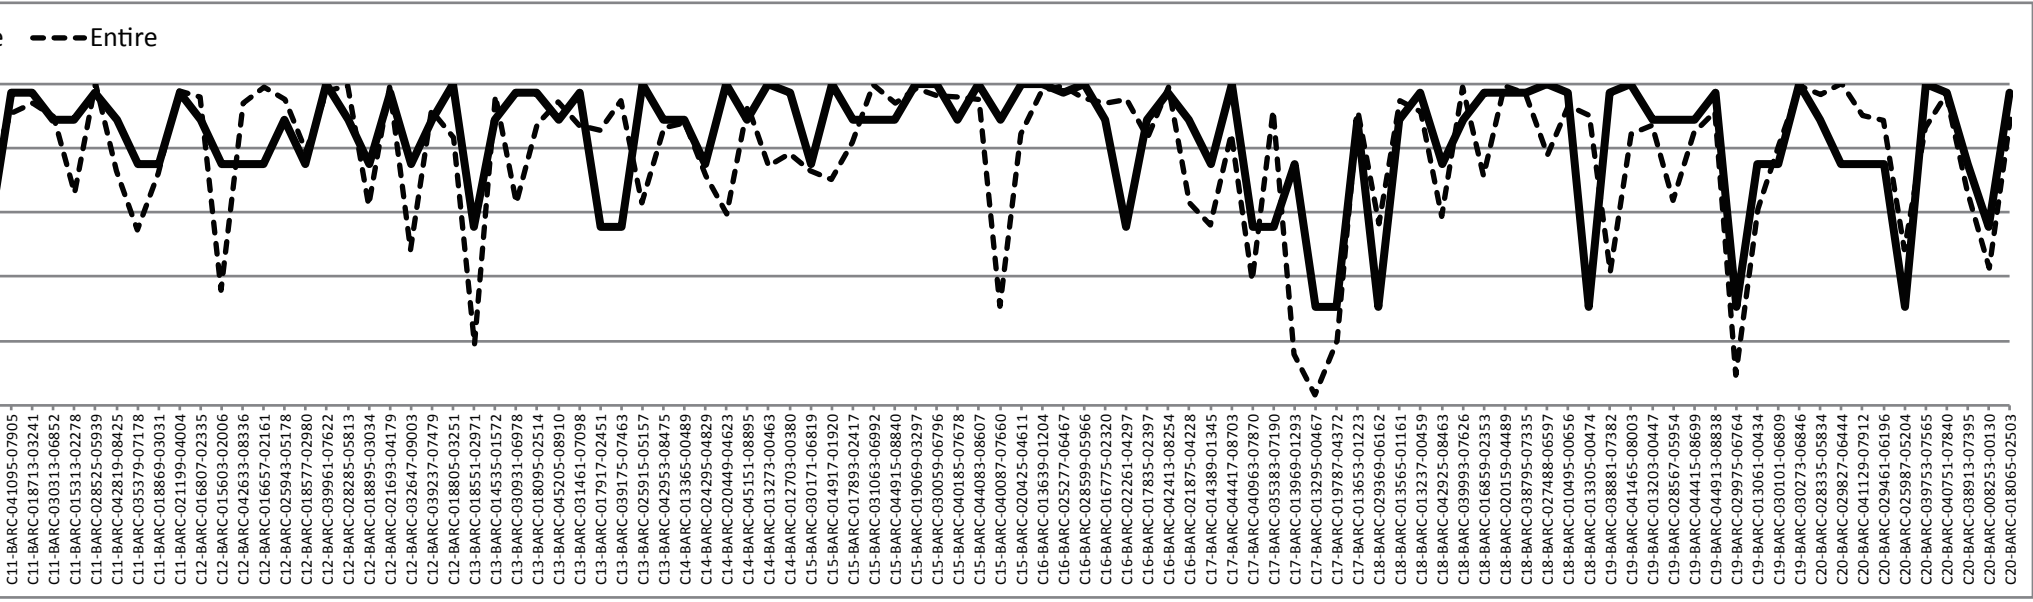

Supplement: 61_566_4.pdf [file 61_566_4.pdf]
